# Supplementary material for: A TGF-β1/LEF1/β-catenin/JLP network motif regulates autophagy and tubule injury in renal fibrosis
Source: JCI journal article supplement (doi:10.1172/jci.insight.196835), 2026-01-08

# Full unedited gel for Figure 2B

Fibronectin

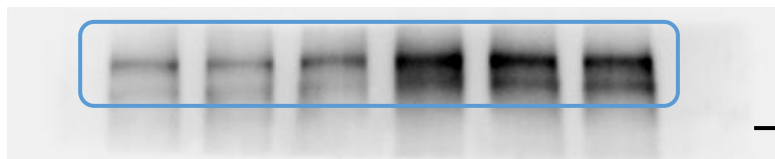

—250 kDa

Collagen I

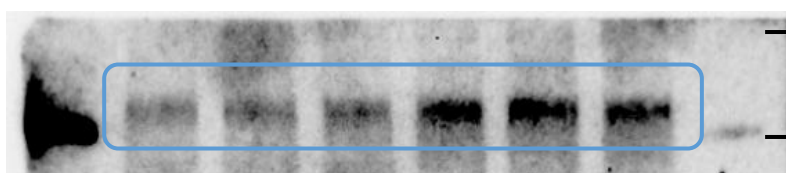

—130 kDa

—100 kDa

LEF1

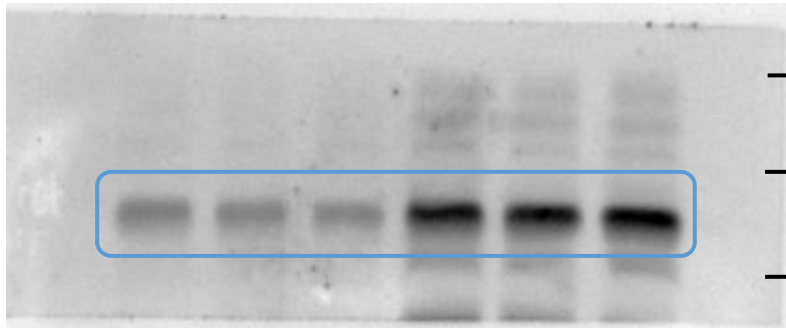

—70 kDa

—55 kDa

—40 kDa

GAPDH

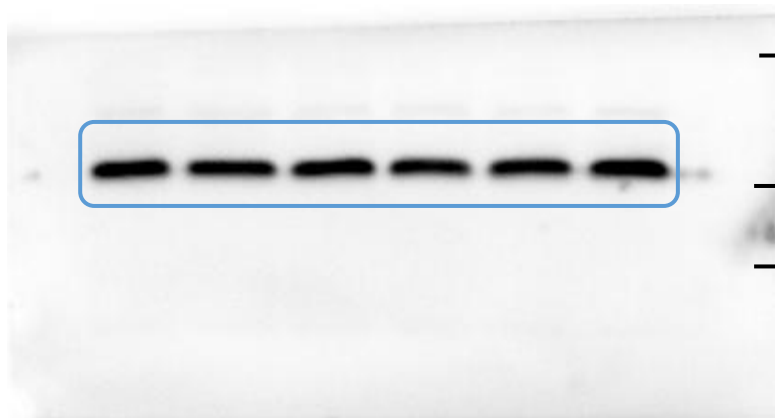

—40 kDa

—35 kDa

—25 kDa

# Full unedited gel for Figure 3B

LEF1

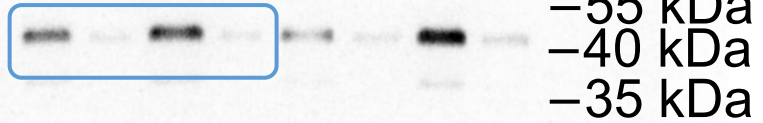

JLP

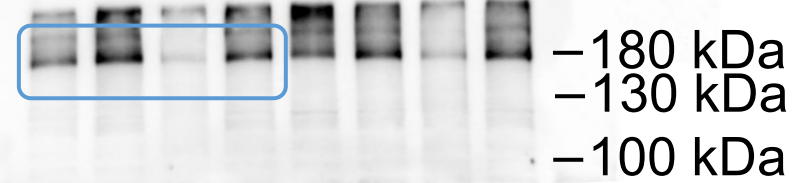

Fibronectin

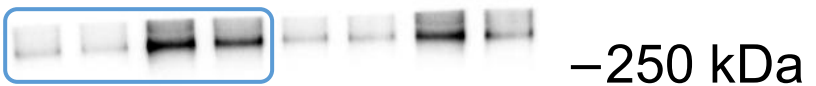

Collagen I

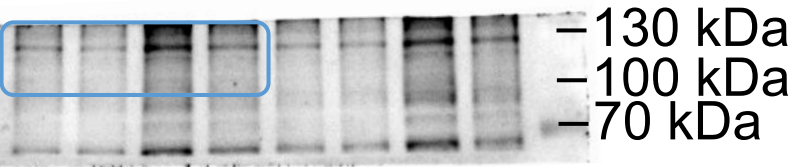

GAPDH

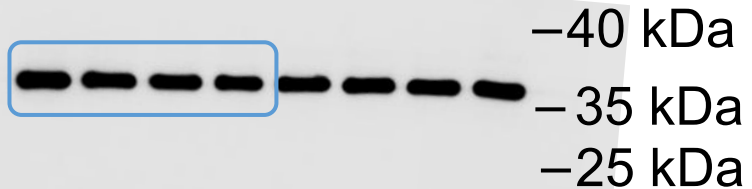

Full unedited gel for Figure 3D

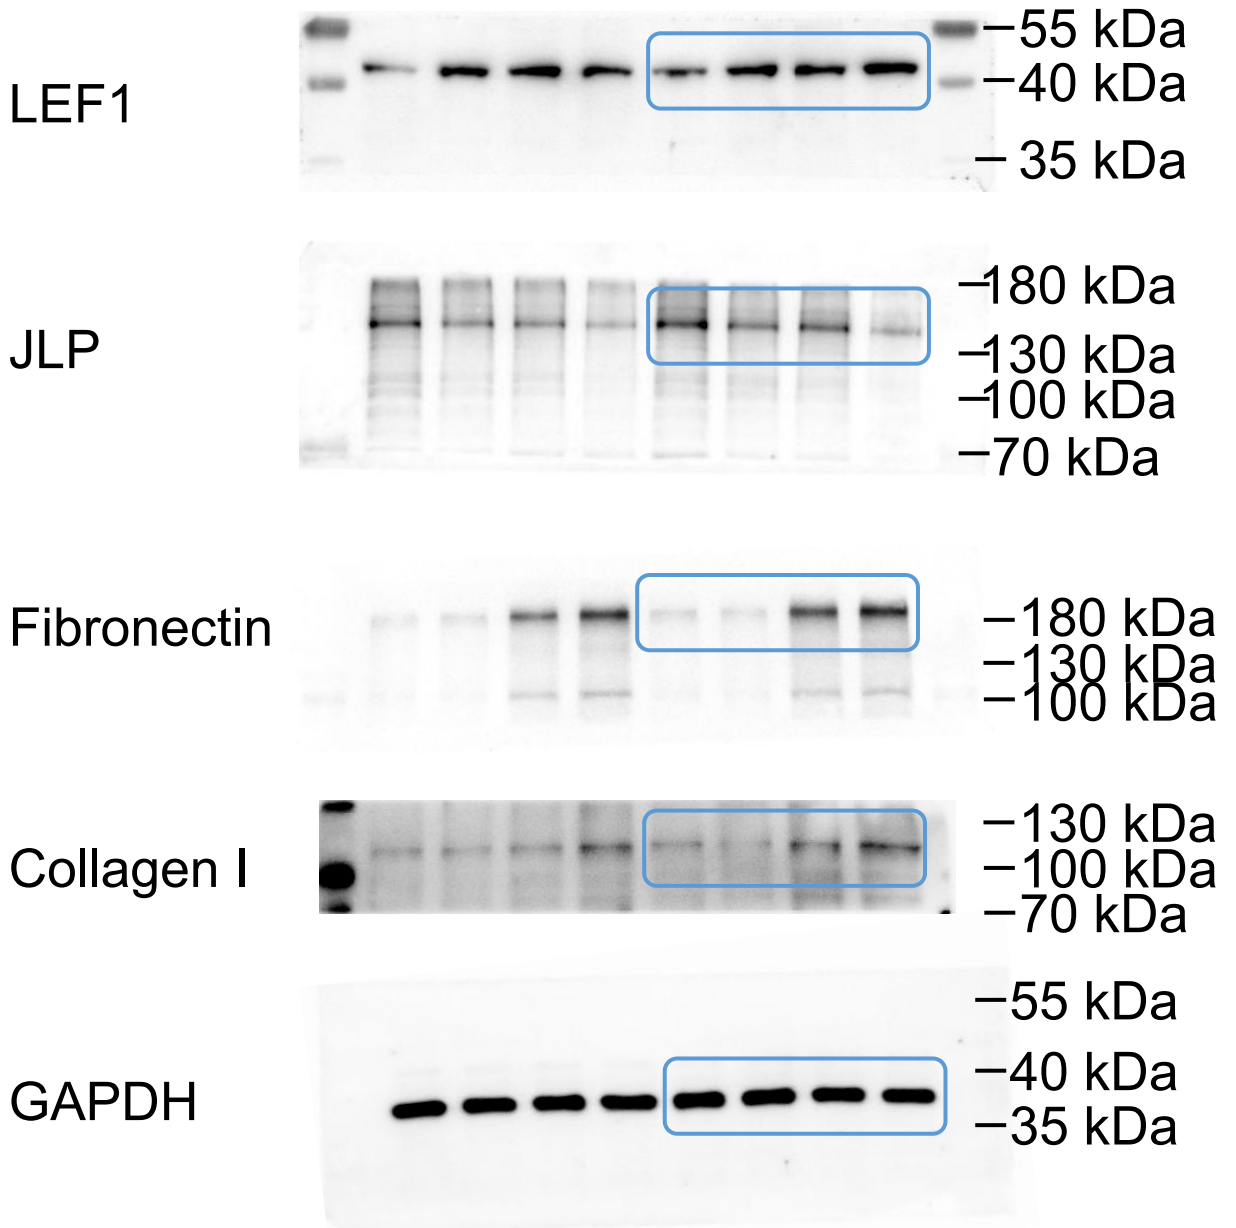

# Full unedited gel for Figure 4A(Left)&4B(Right)

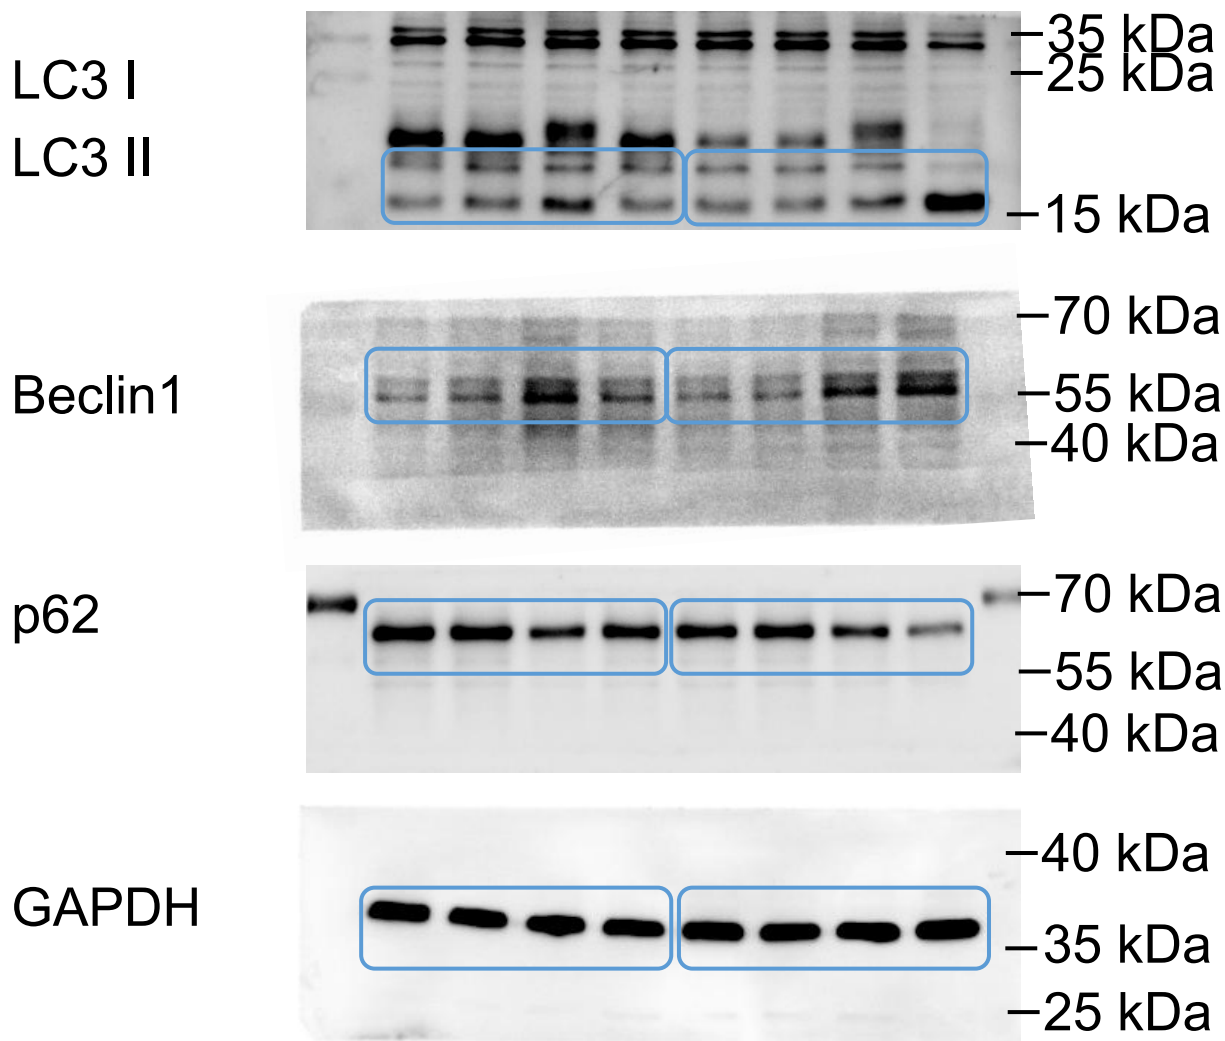

# Full unedited gel for Figure 4F

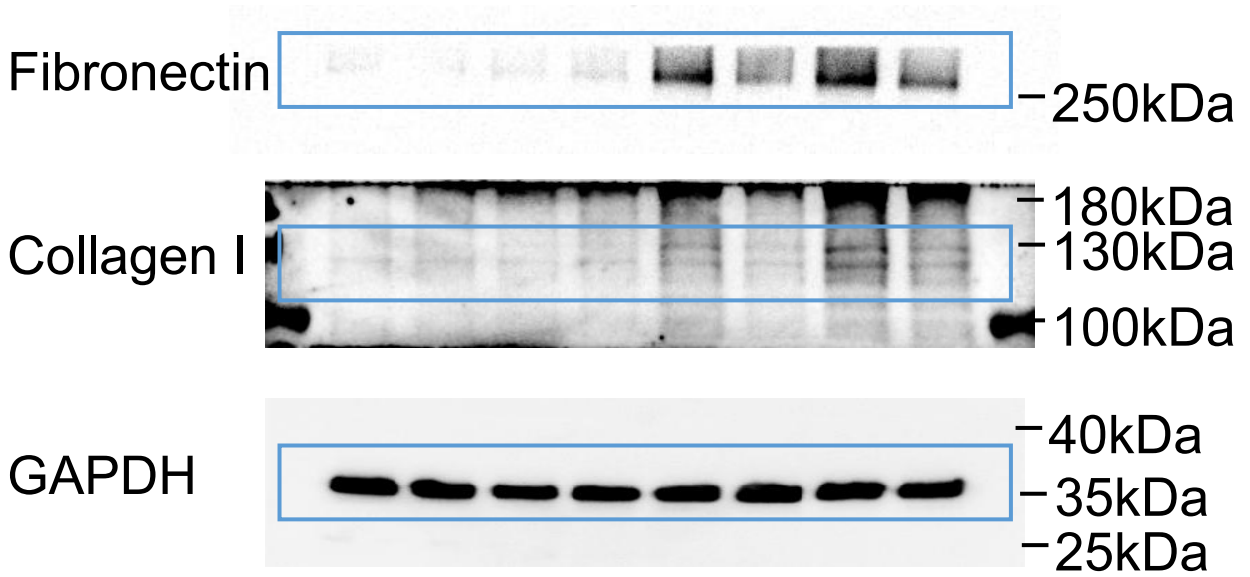

Full unedited gel for Figure 4G

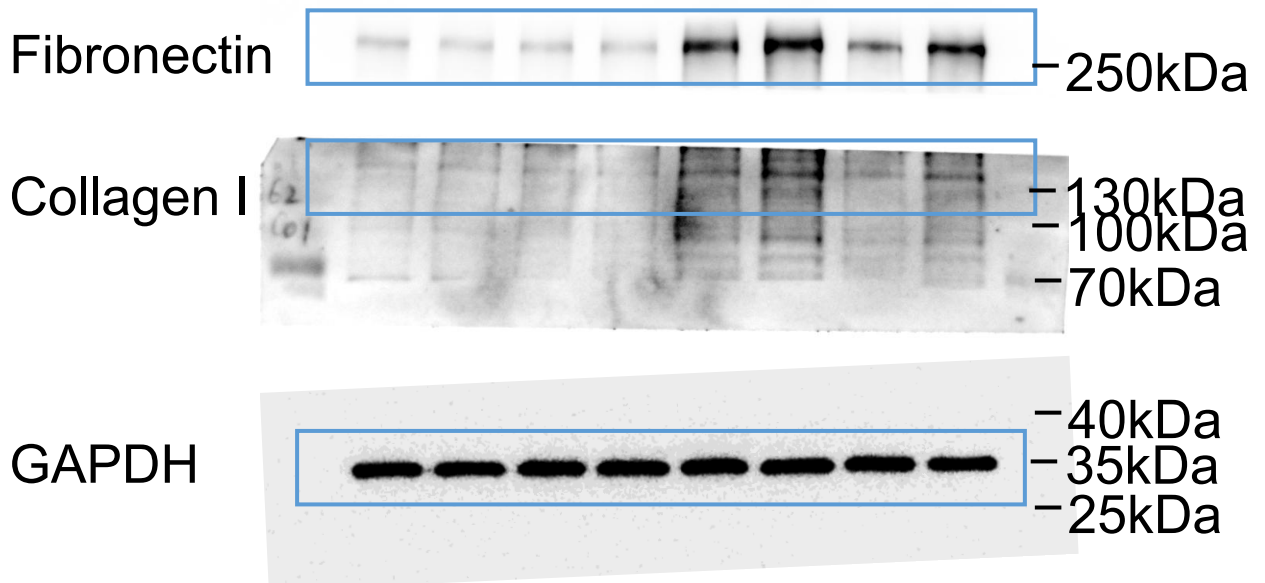

# Full unedited gel for Figure 4H

Fibronectin

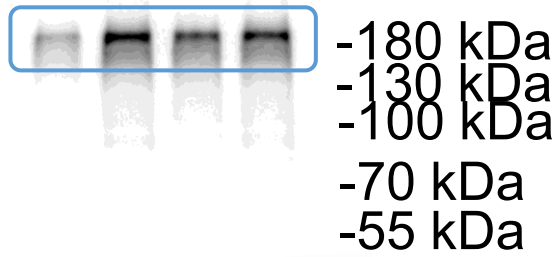

Collagen I

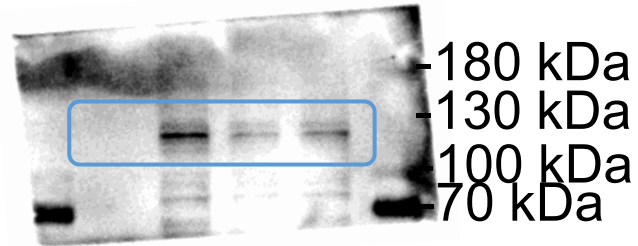

LC3 I

LC3 II

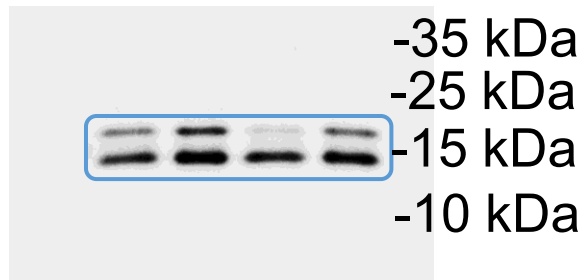

Beclin1

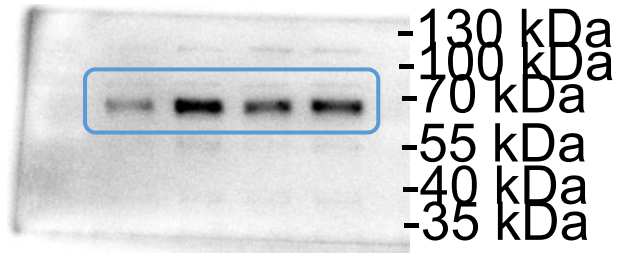

P62

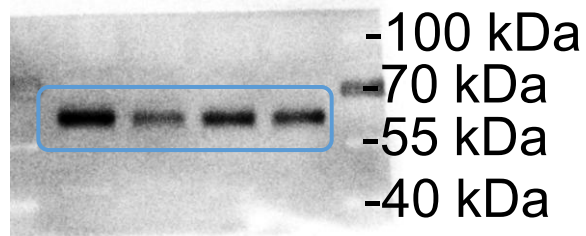

GAPDH

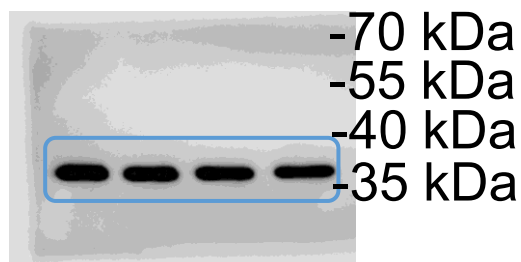

# Full unedited gel for Figure 4J

Fibronectin

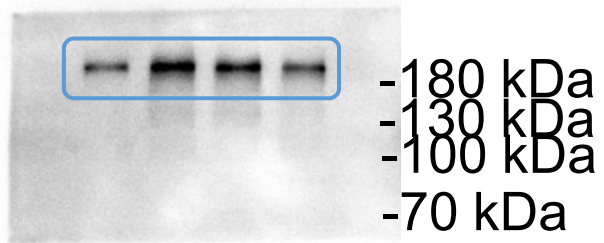

Collagen I

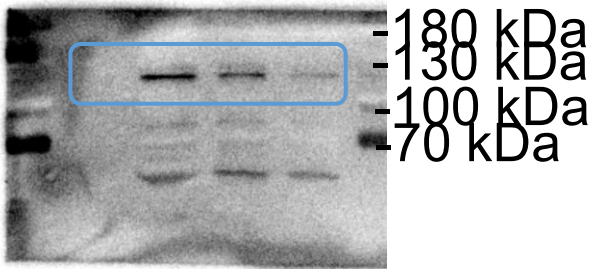

LC3 I

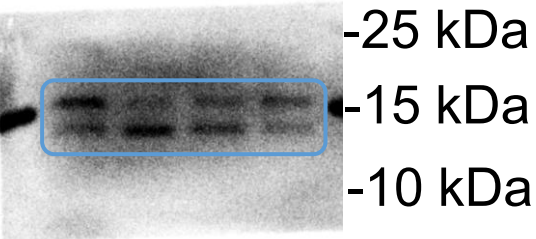

Beclin1

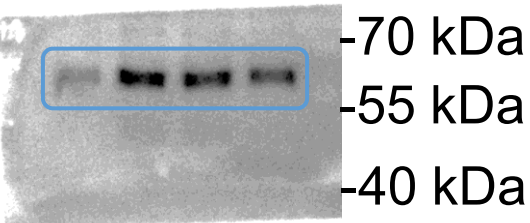

P62

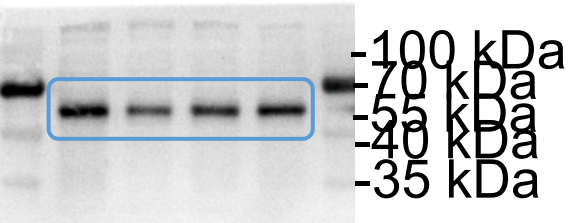

GAPDH

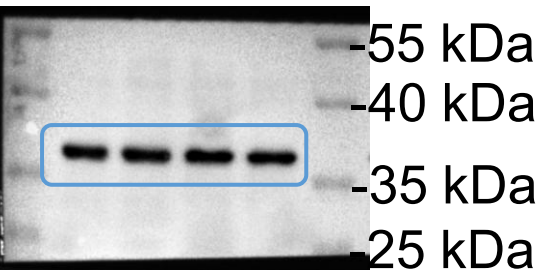

# Full unedited gel for Figure 5F

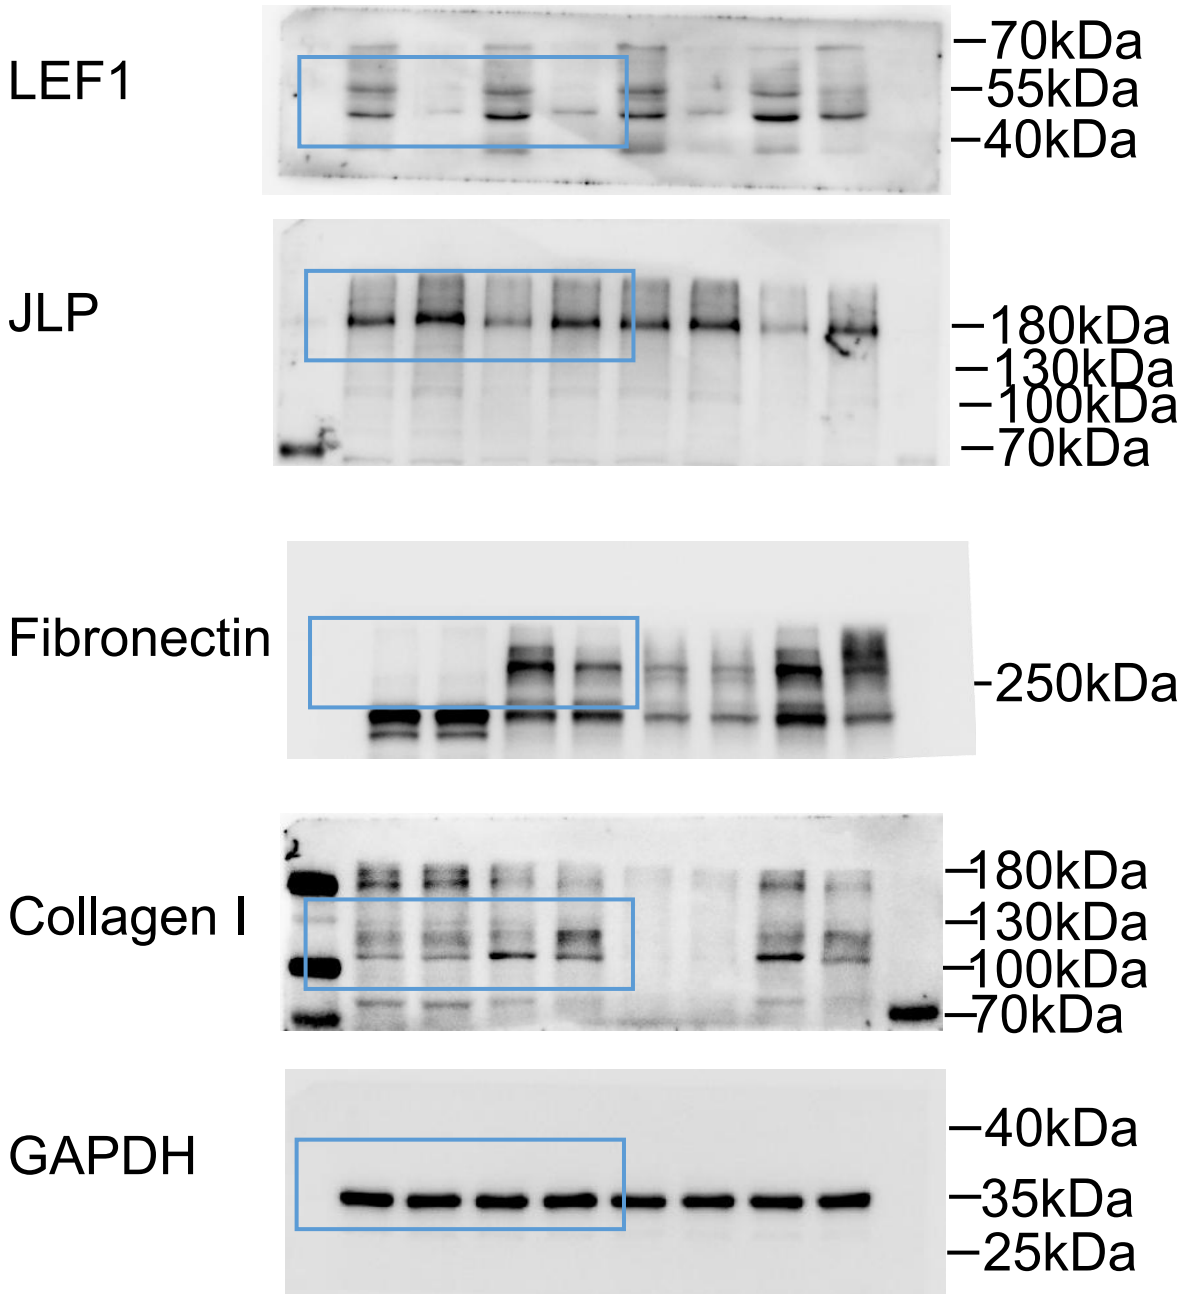

# Full unedited gel for Figure 5M

LC3 I  
LC3 II

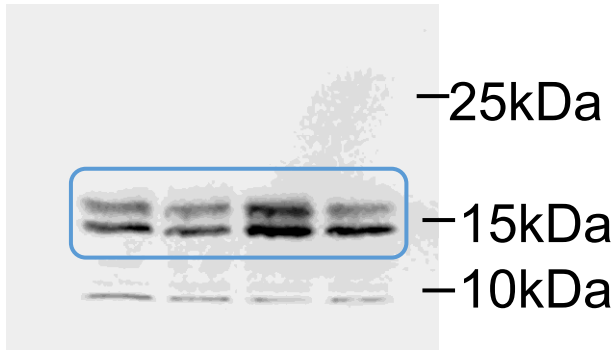

Beclin1

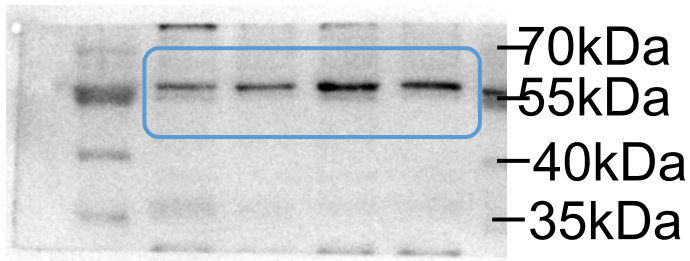

p62

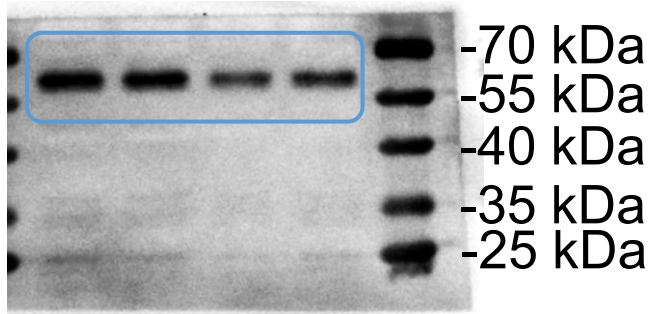

GAPDH

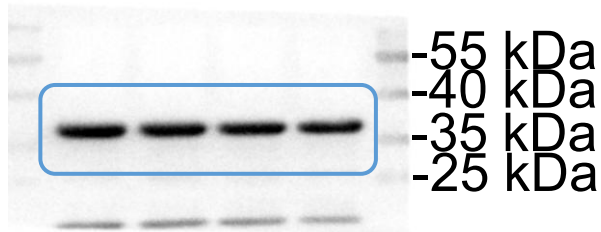

# Full unedited gel for Figure 6D

LEF1

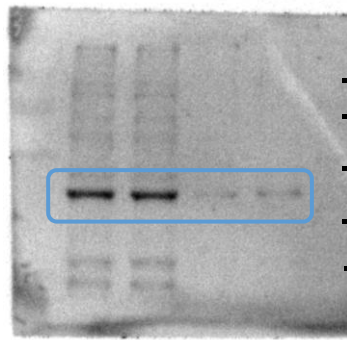

-100 kDa  
-70 kDa  
-55 kDa  
-40 kDa  
-35 kDa

GAPD  
H

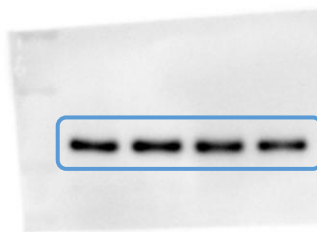

-55 kDa  
-40 kDa  
-35 kDa  
-25 kDa

# Full unedited gel for Figure 6J

Fibronectin

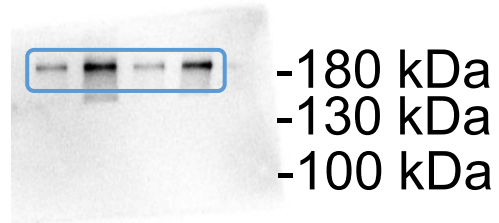

Collagen I

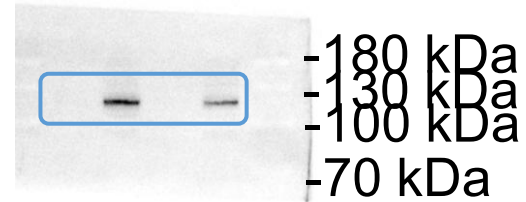

LC3 I

LC3 II

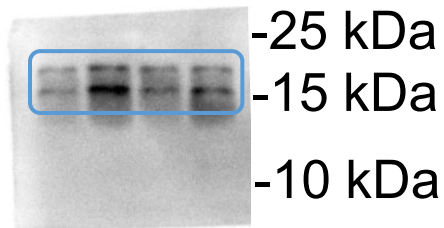

Beclin1

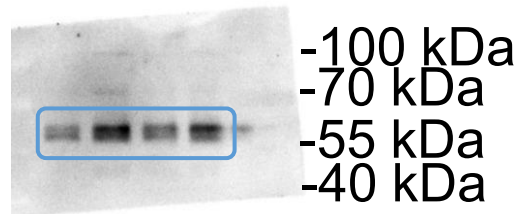

P62

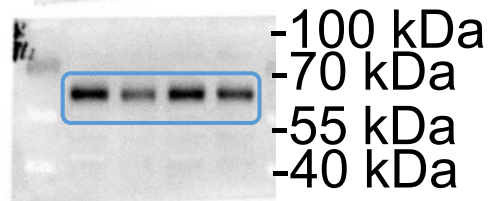

JLP

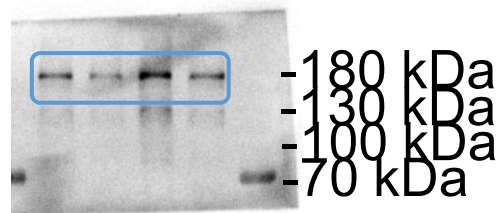

GAPDH

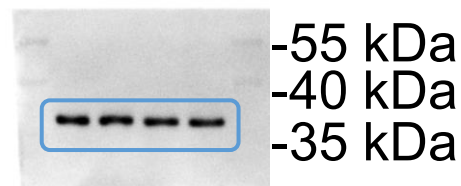

# Full unedited gel for Figure 7A IP

$\beta$ -catenin

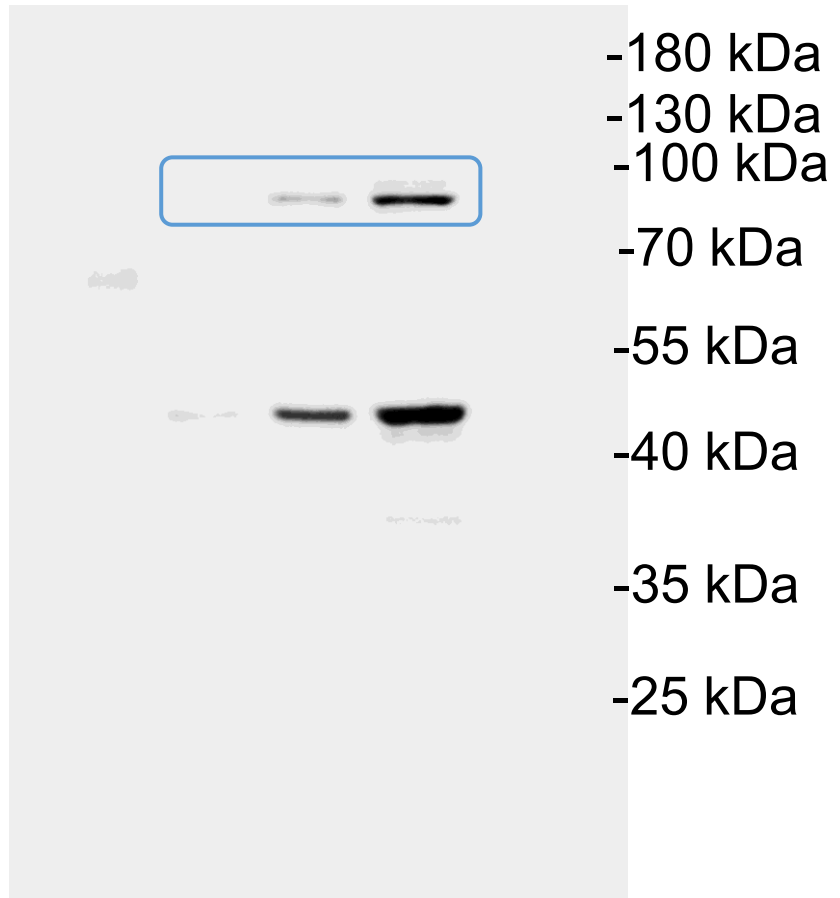

LEF1

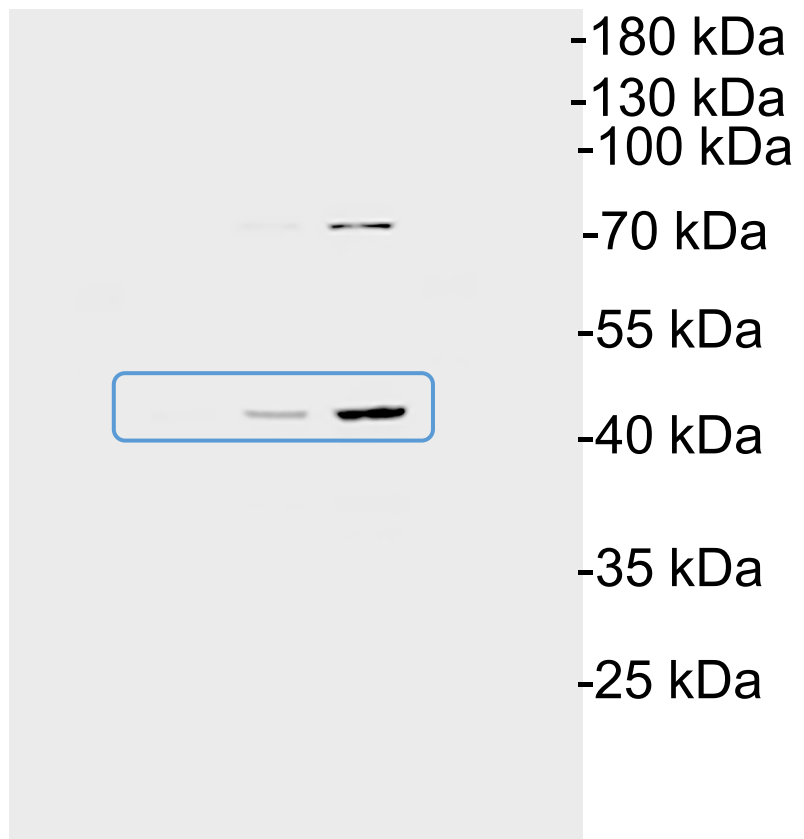

# Full unedited gel for Figure 7A Input

$\beta$ -catenin

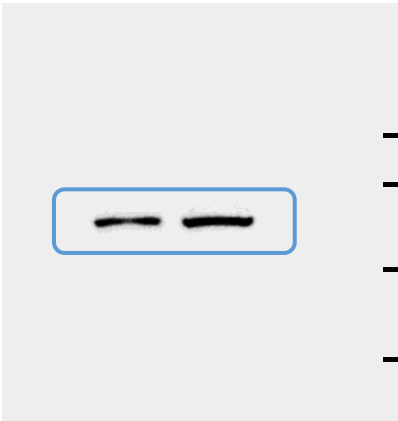

-130 kDa  
-100 kDa  
-70 kDa  
-55 kDa

LEF1

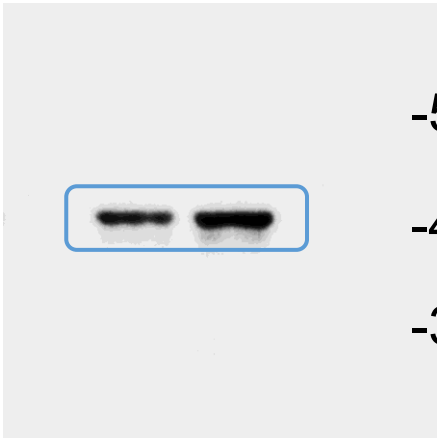

-55 kDa  
-40 kDa  
-35 kDa

GAPDH

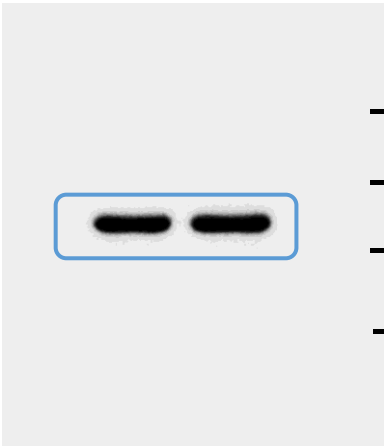

-55 kDa  
-40 kDa  
-35 kDa  
-25 kDa

# Full unedited gel for Figure 7D IP

$\beta$ -catenin

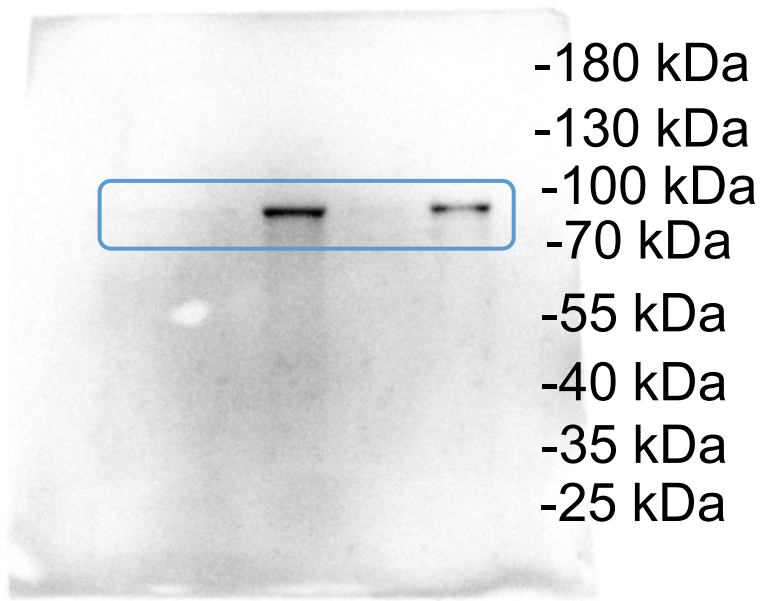

LEF1

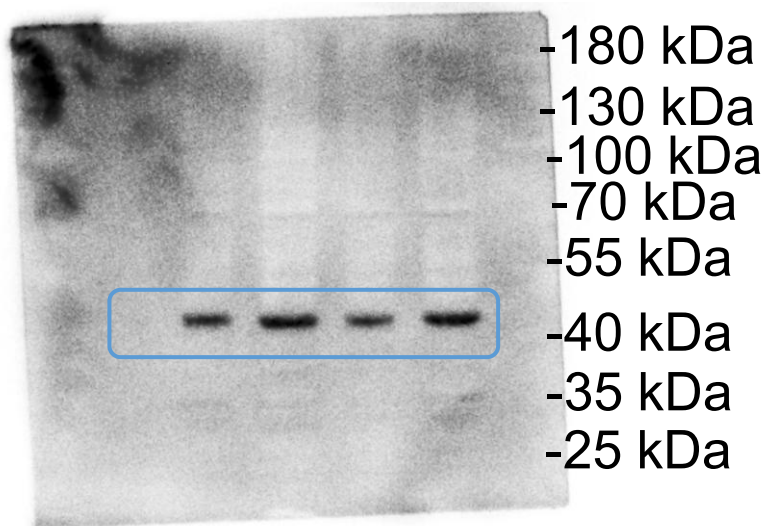

# Full unedited gel for Figure 7D Input

$\beta$ -catenin

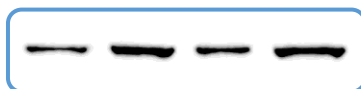

-180 kDa  
-130 kDa  
-100 kDa  
-70 kDa

LEF1

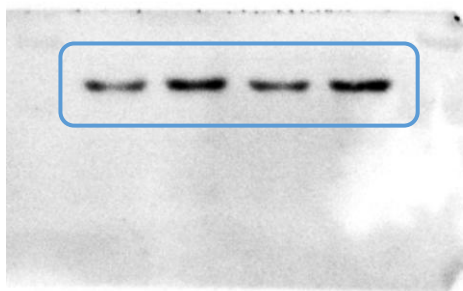

-55 kDa  
-40 kDa  
-35 kDa  
-25 kDa

GAPDH

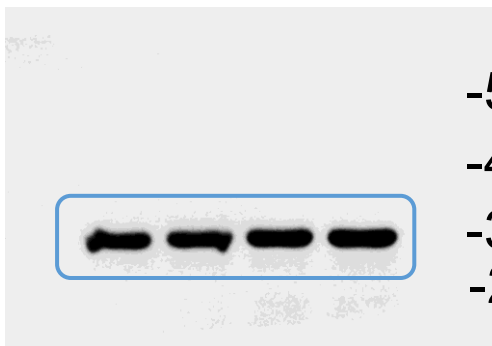

-55 kDa  
-40 kDa  
-35 kDa  
-25 kDa

# Full unedited gel for Figure 7E

Fibronectin

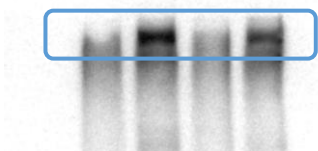

-180 kDa  
-130 kDa  
-100 kDa

Collagen I

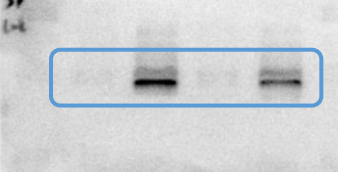

-180 kDa  
-130 kDa  
-100 kDa  
-70 kDa

LC3 I  
LC3 II

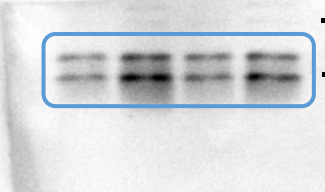

-25 kDa  
-15 kDa  
-10 kDa

Beclin1

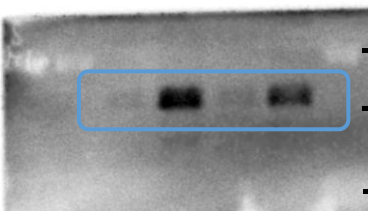

-70 kDa  
-55 kDa  
-40 kDa

P62

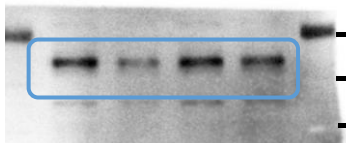

-70 kDa  
-55 kDa  
-40 kDa

JLP

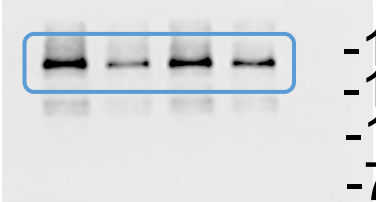

-180 kDa  
-130 kDa  
-100 kDa  
-70 kDa

GAPDH

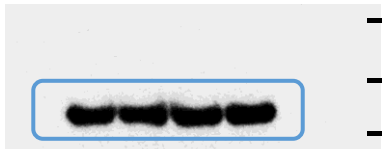

-55 kDa  
-40 kDa  
-35 kDa

# Full unedited gel for Figure 7F

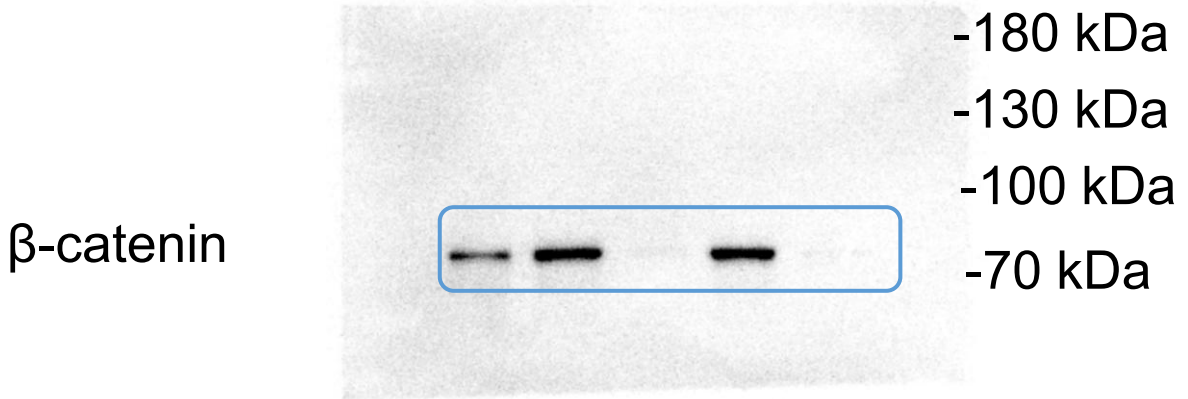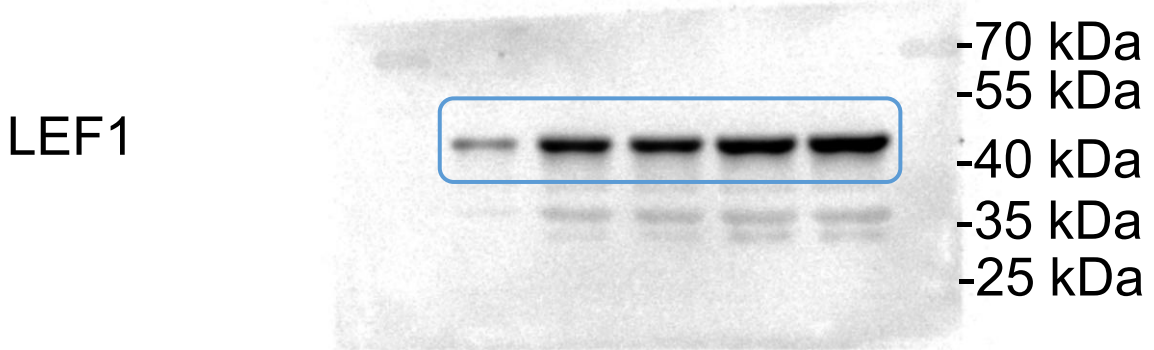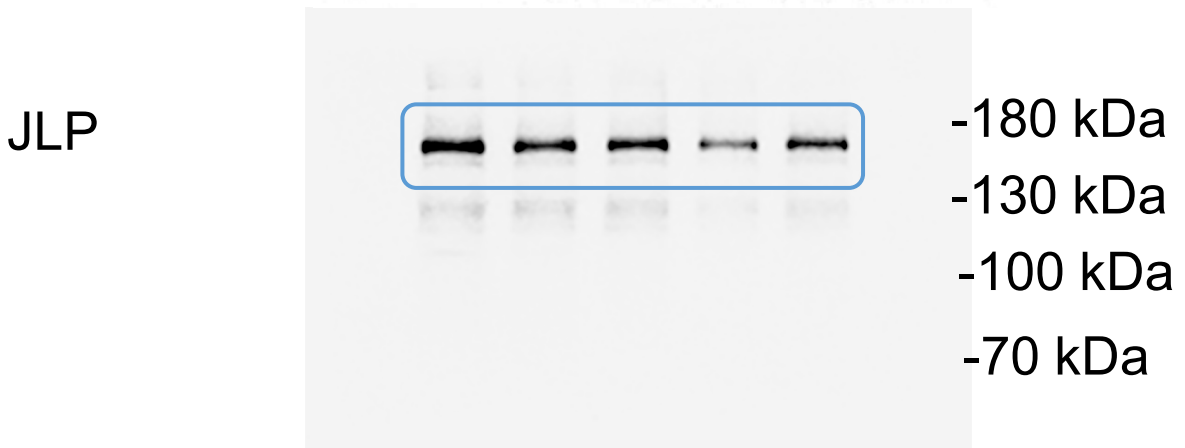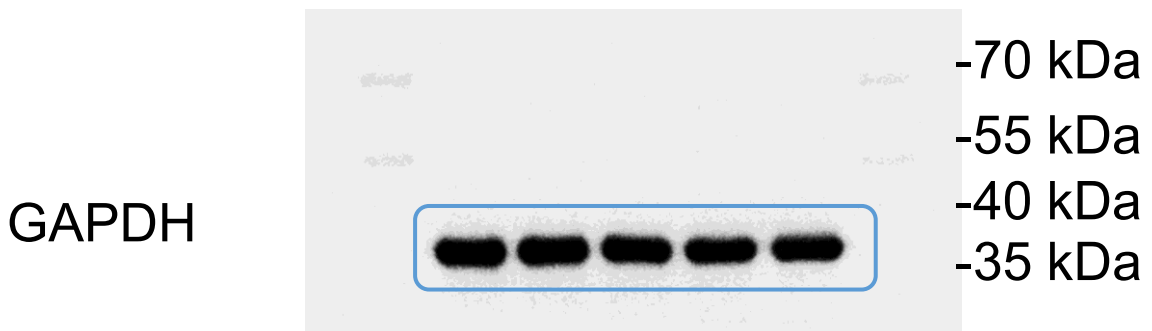

# Full unedited gel for Figure 7G

$\beta$ -catenin

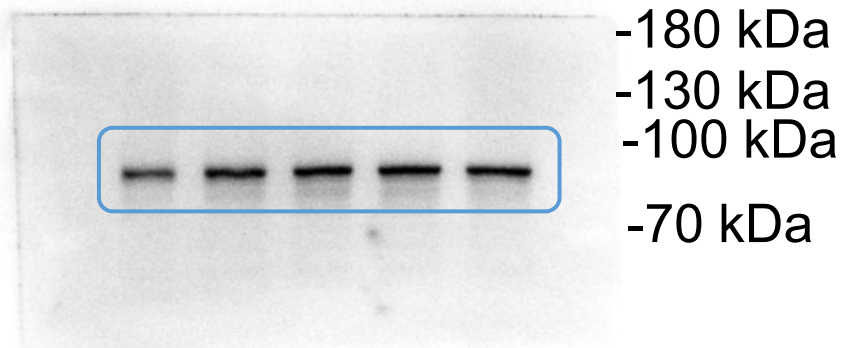

LEF1

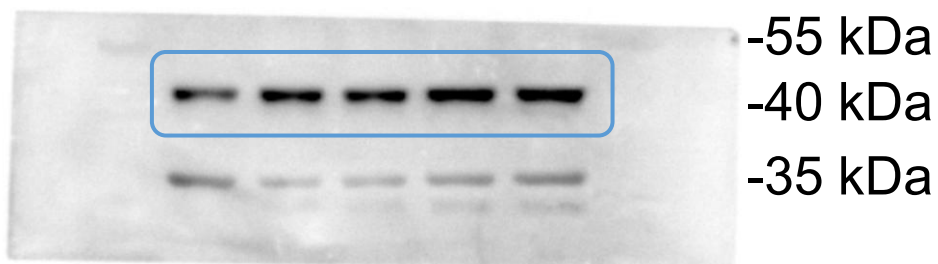

JLP

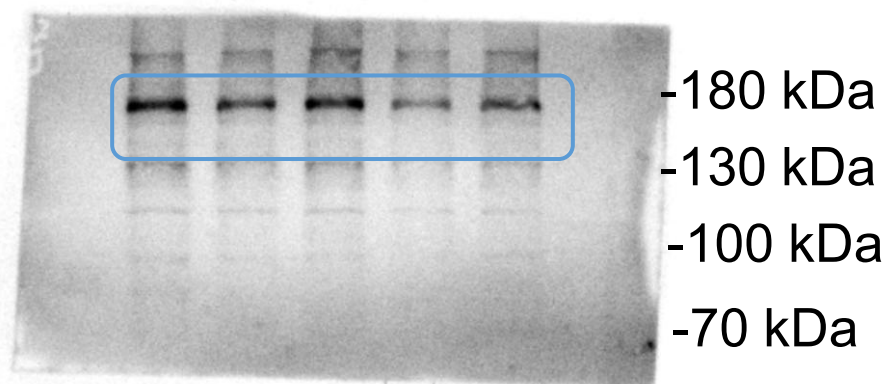

GAPDH

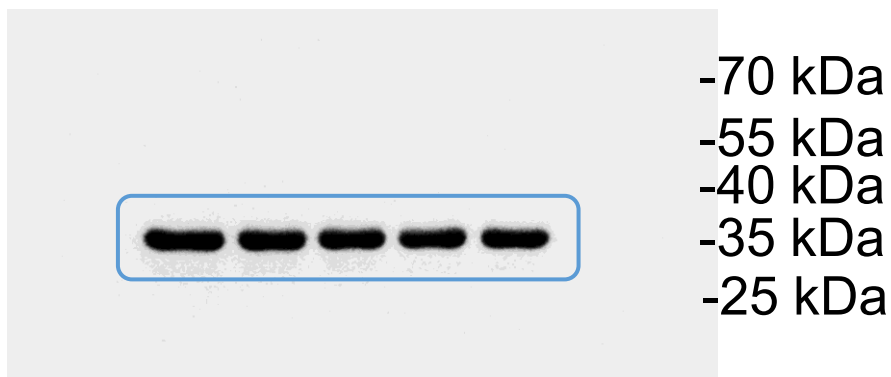

# Full unedited gel for Figure 8G

Fibronectin

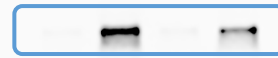

-180 kDa  
-130 kDa  
-100 kDa

Collagen I

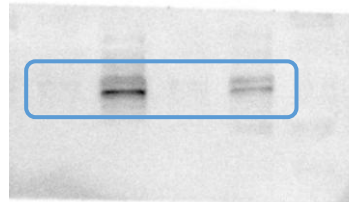

-180 kDa  
-130 kDa  
-100 kDa  
-70 kDa

LC3 I

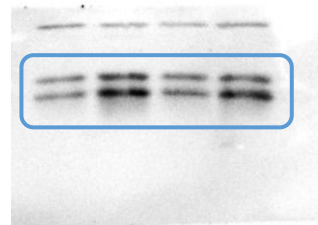

-25 kDa

LC3 II

-15 kDa

-10 kDa

Beclin1

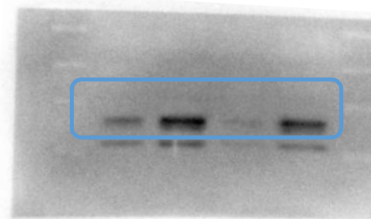

-130 kDa  
-100 kDa  
-70 kDa  
-55 kDa  
-40 kDa

P62

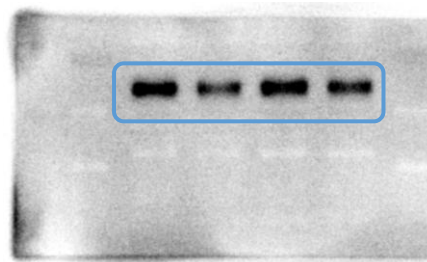

-70 kDa  
-55 kDa  
-40 kDa

JLP

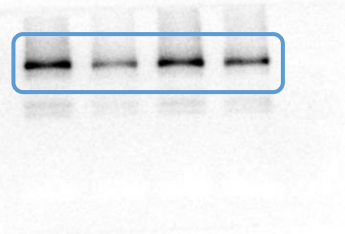

-180 kDa  
-130 kDa  
-100 kDa  
-70 kDa

GAPDH

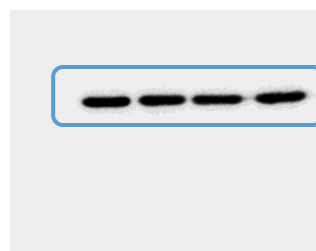

-40 kDa  
-35 kDa  
-25 kDa

Full unedited gel for Figure S1B

LEF1

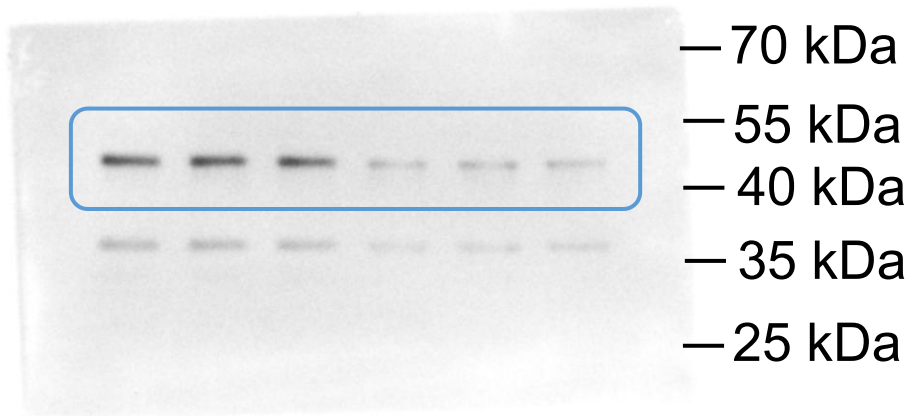

GAPDH

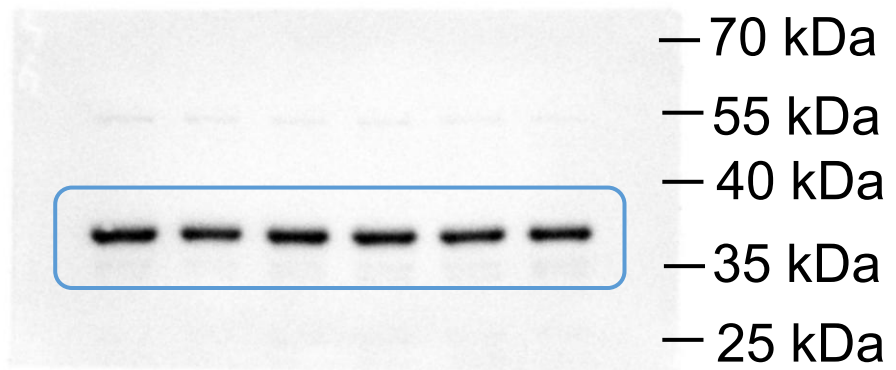

# Full unedited gel for Figure S1C

LEF1

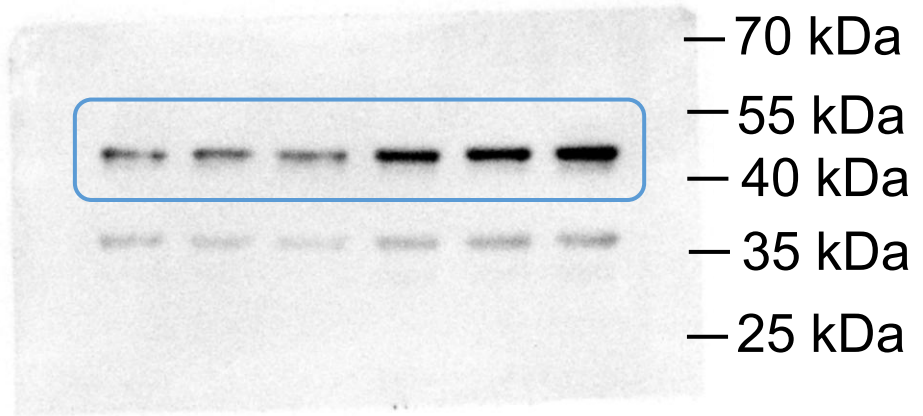

GAPDH

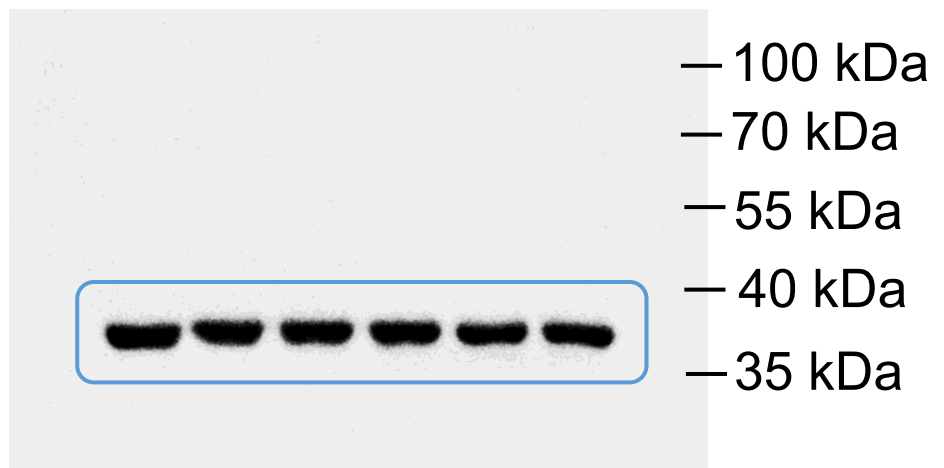

# Full unedited gel for Figure 3B

Fibronectin

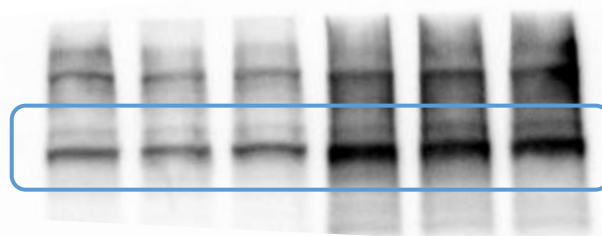

-250 kDa

Collagen I

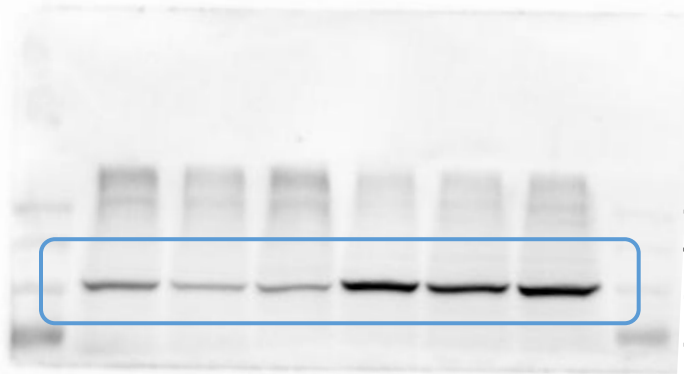

-180 kDa  
-130 kDa  
-100 kDa  
-70 kDa

LEF1

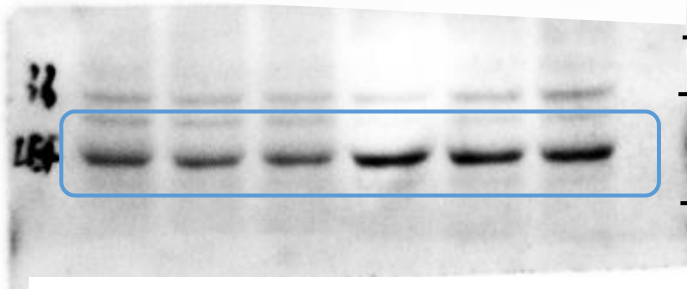

-70 kDa  
-55 kDa  
-40 kDa

JLP

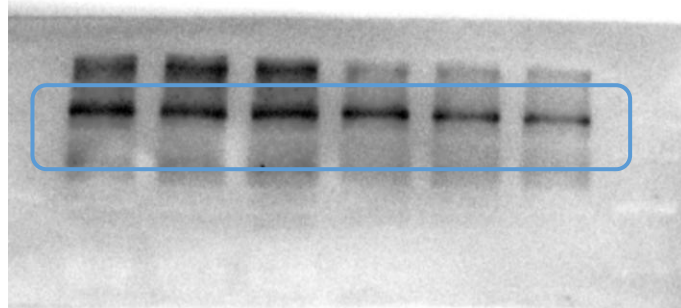

-180 kDa  
-130 kDa  
-100 kDa  
-70 kDa

GAPDH

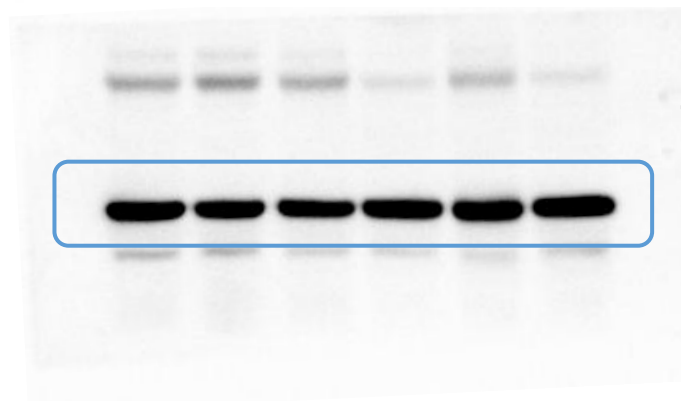

-40 kDa  
-35 kDa  
-25 kDa

# Full unedited gel for Figure S4B

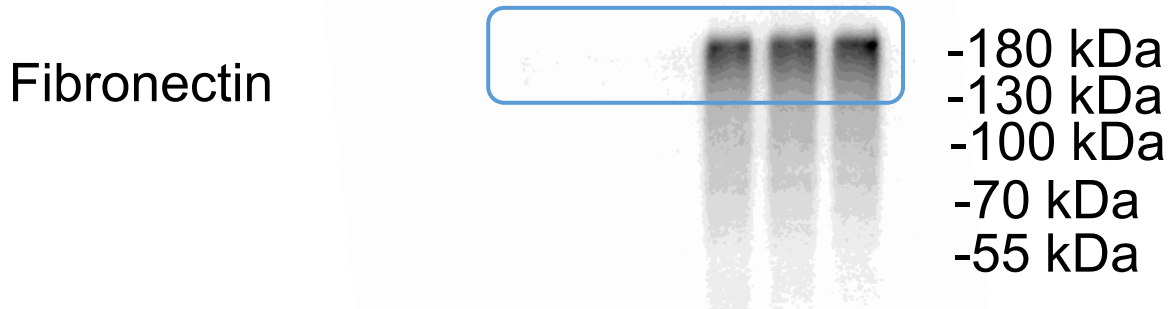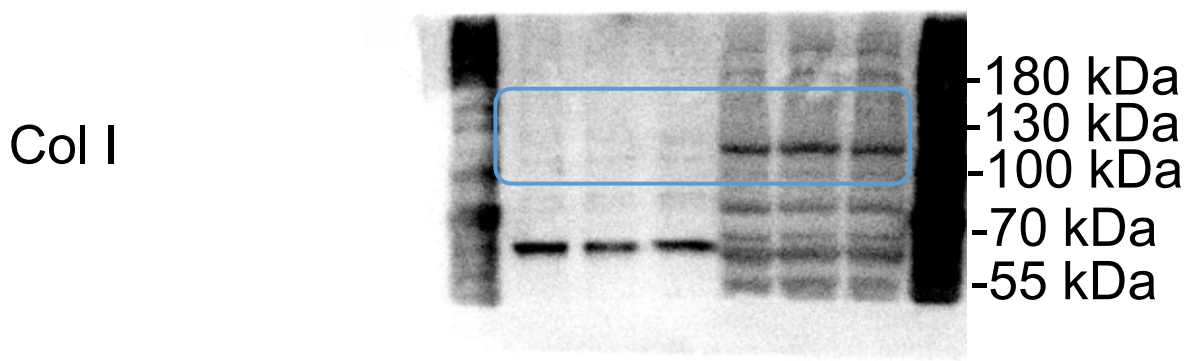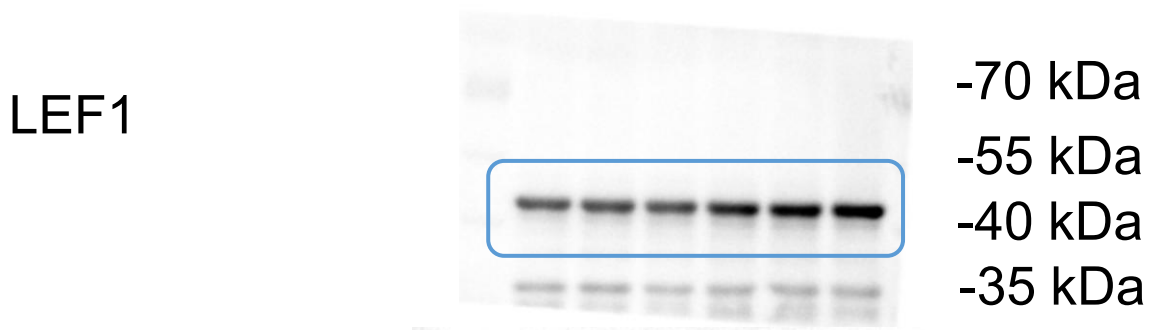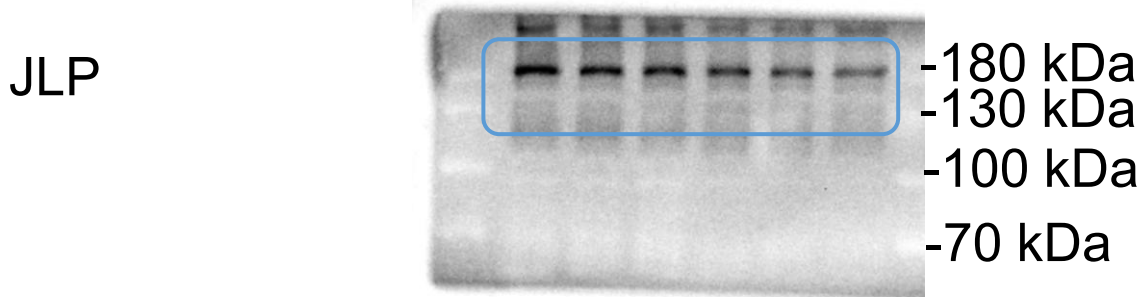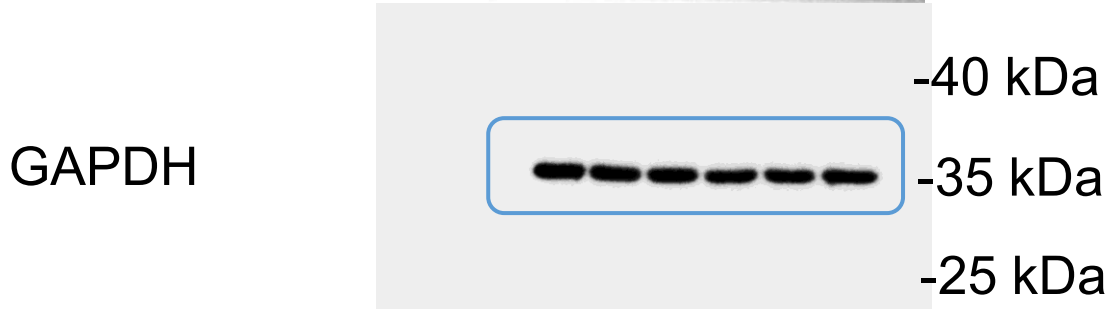

Full unedited gel for Figure S4G

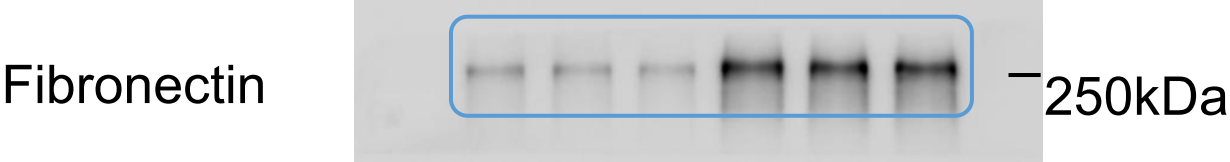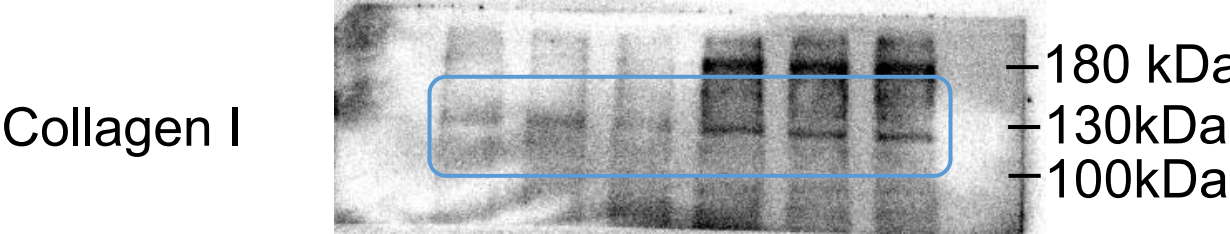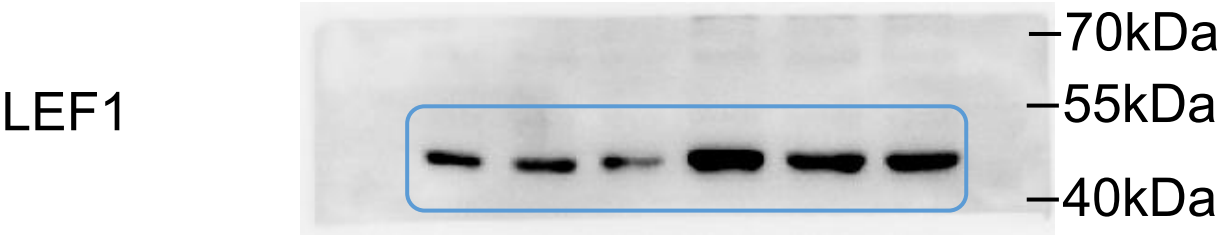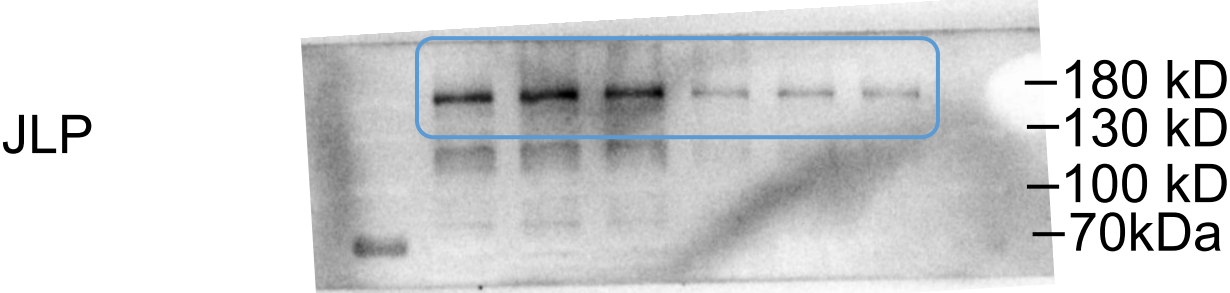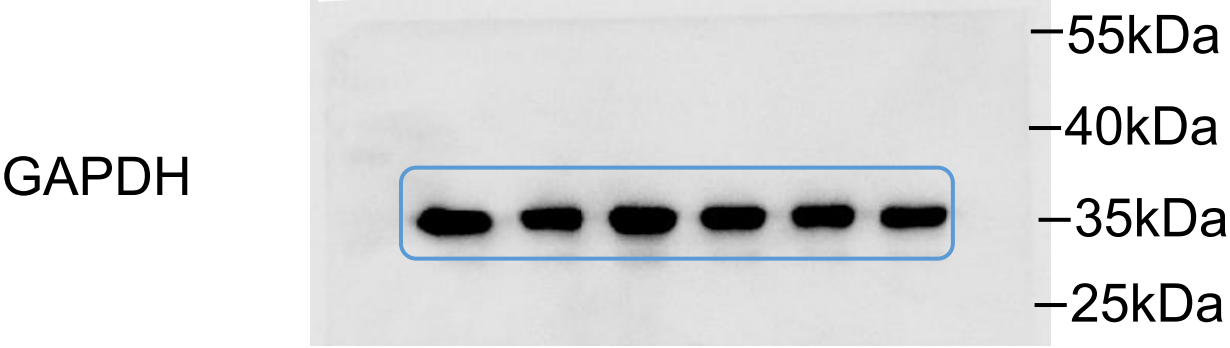

# Full unedited gel for Figure S5A

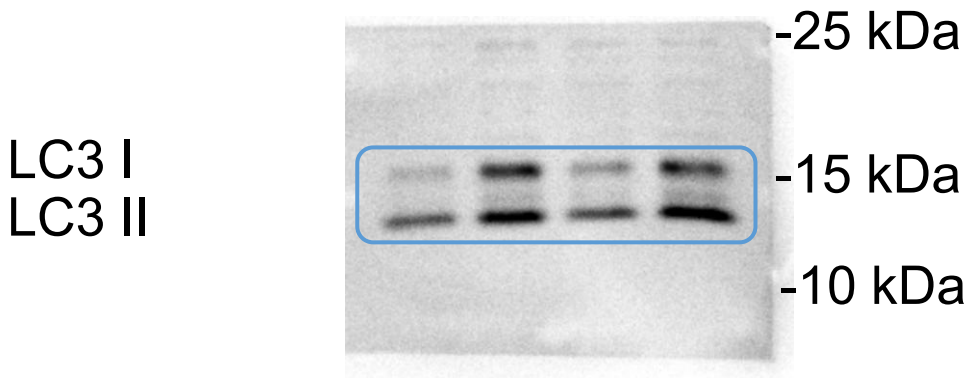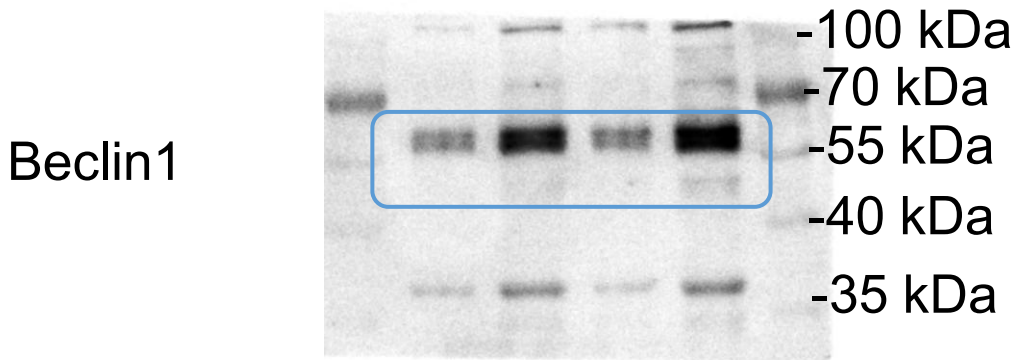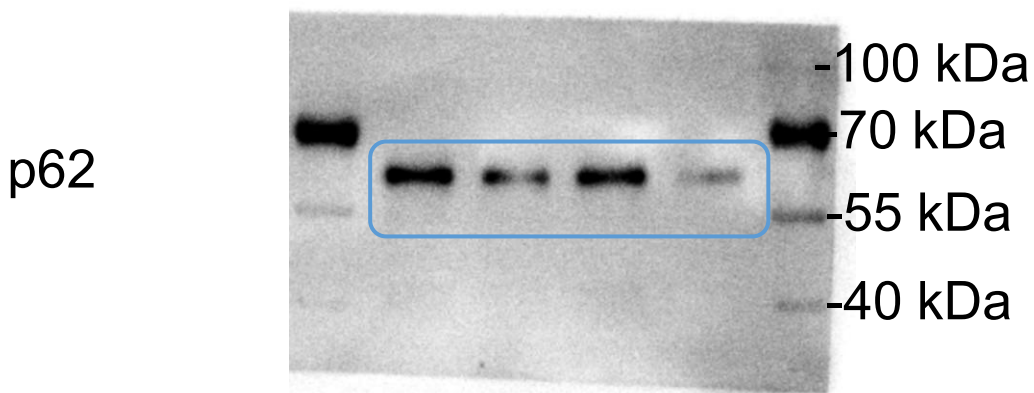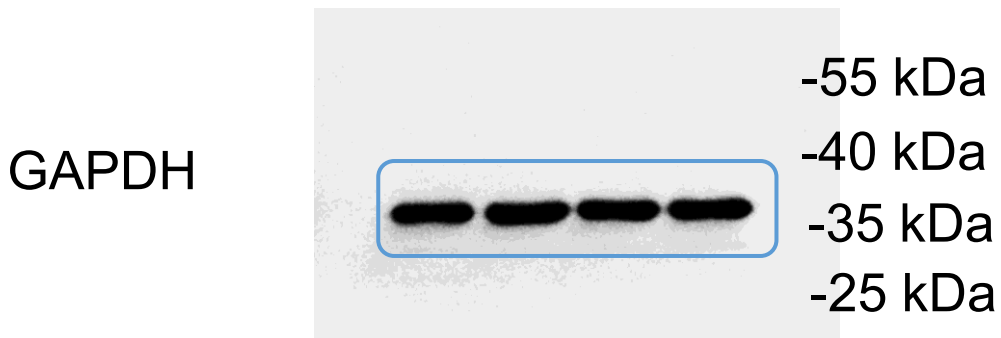

# Full unedited gel for Figure S5B

LC3 I  
LC3 II

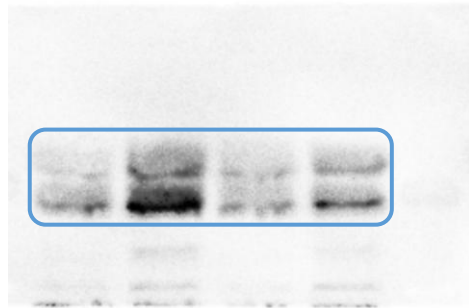

-25 kDa  
-15 kDa  
-10 kDa

Beclin1

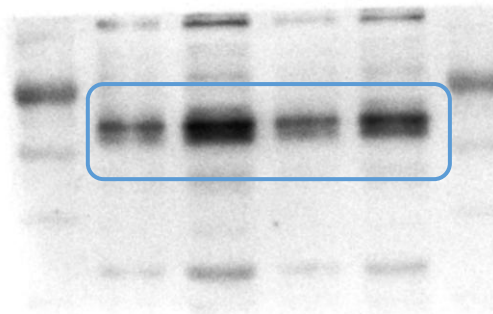

-100 kDa  
-70 kDa  
-55 kDa  
-40 kDa  
-35 kDa

p62

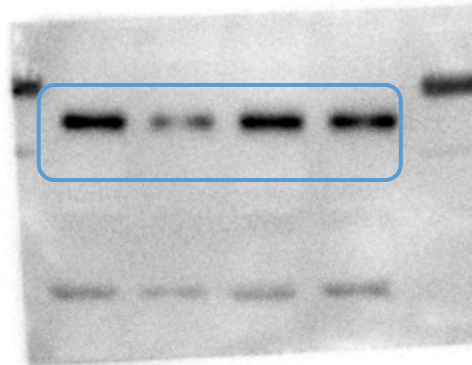

-100 kDa  
-70 kDa  
-55 kDa  
-40 kDa  
-35 kDa

GAPDH

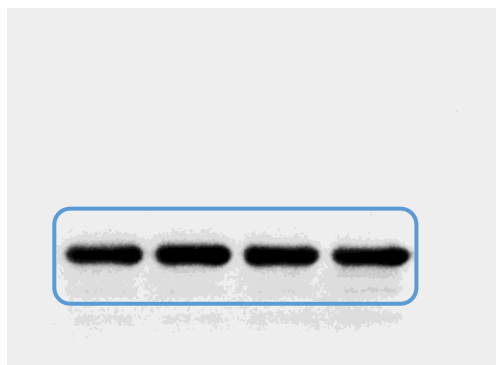

-70 kDa  
-55 kDa  
-40 kDa  
-35 kDa

# Full unedited gel for Figure S7D

LEF1

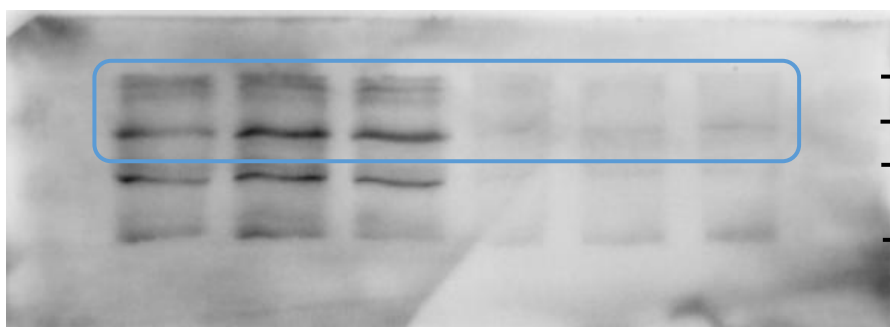

— 70 kDa  
— 55 kDa  
— 40 kDa  
— 35 kDa

GAPDH

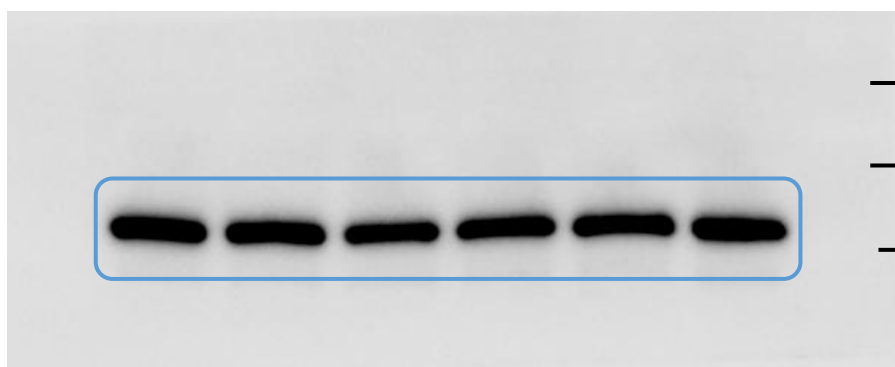

— 55 kDa  
— 40 kDa  
— 35 kDa

# Full unedited gel for Figure S8E

LEF1

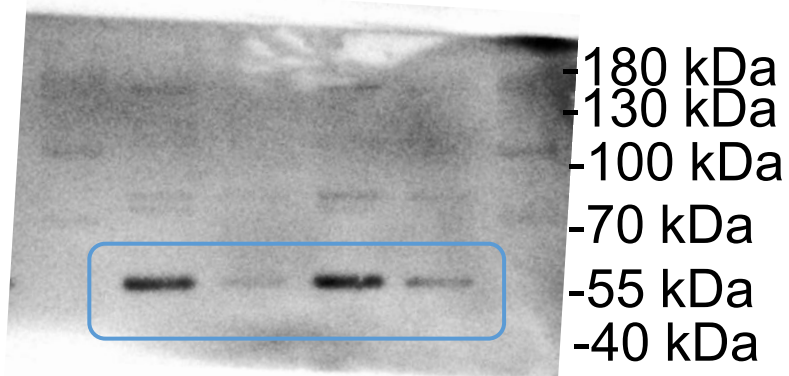

JLP

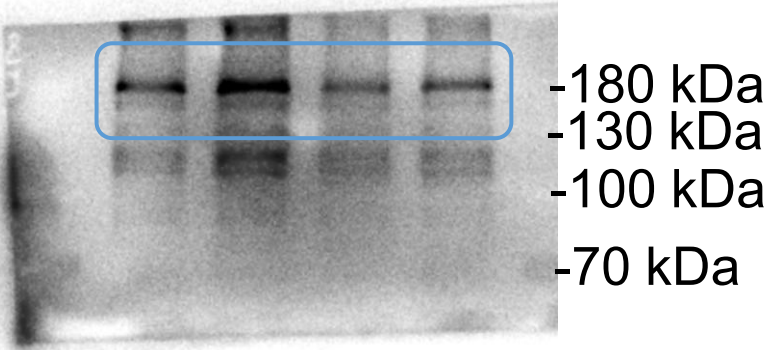

Fibronectin

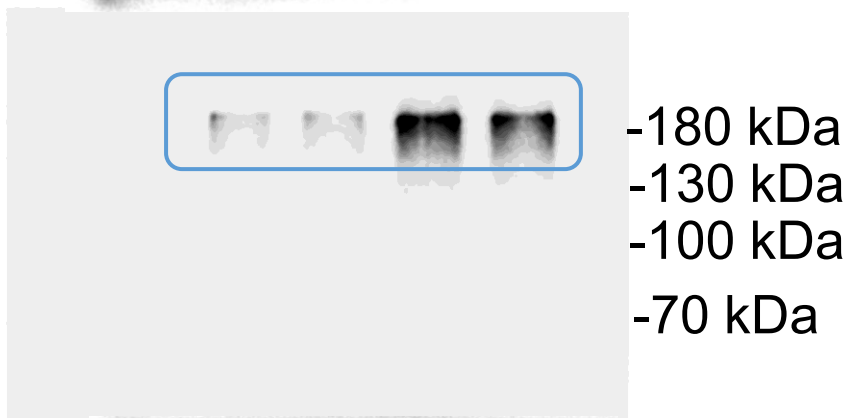

Col I

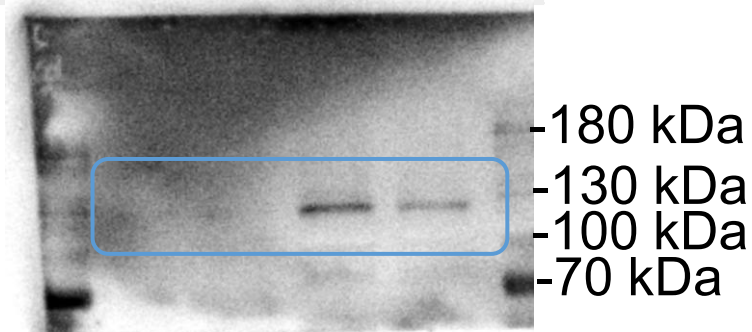

GAPDH

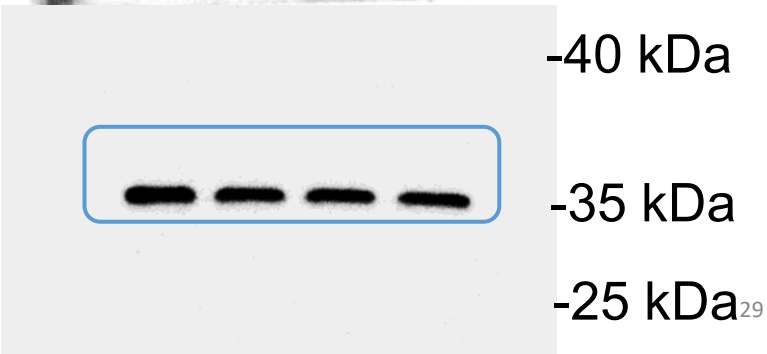

# Full unedited gel for Figure S8I

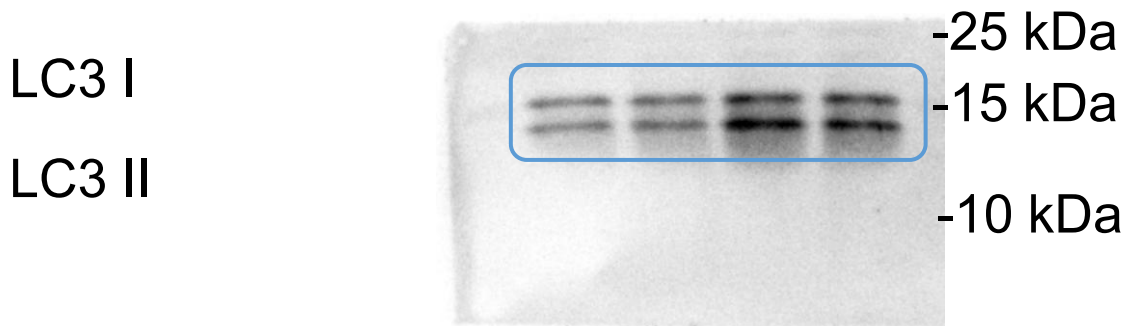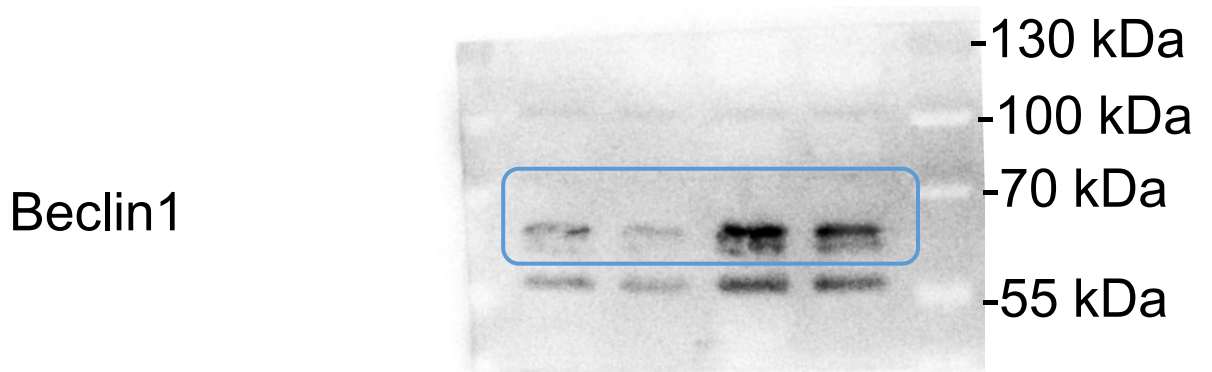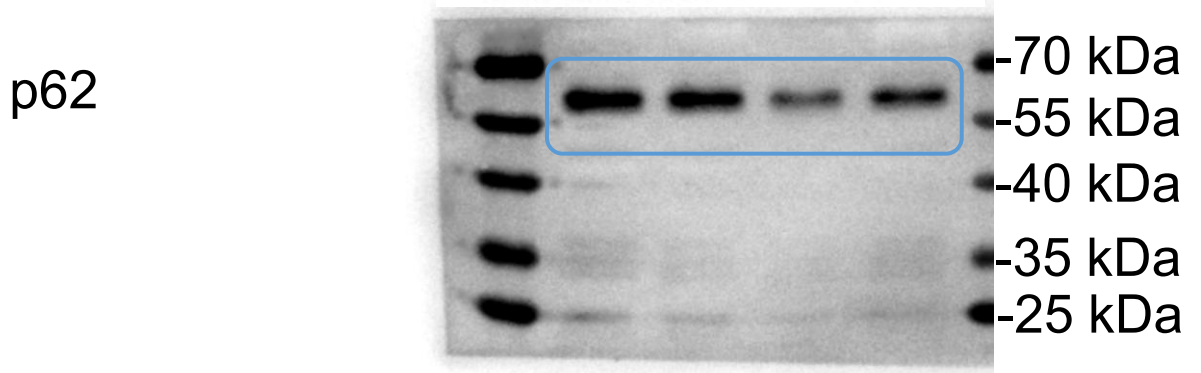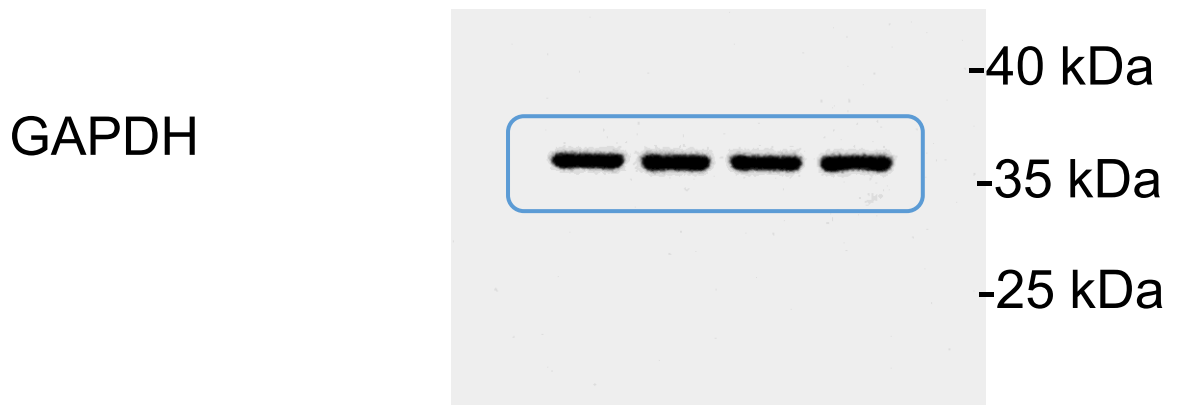

# Full unedited gel for Figure S9A

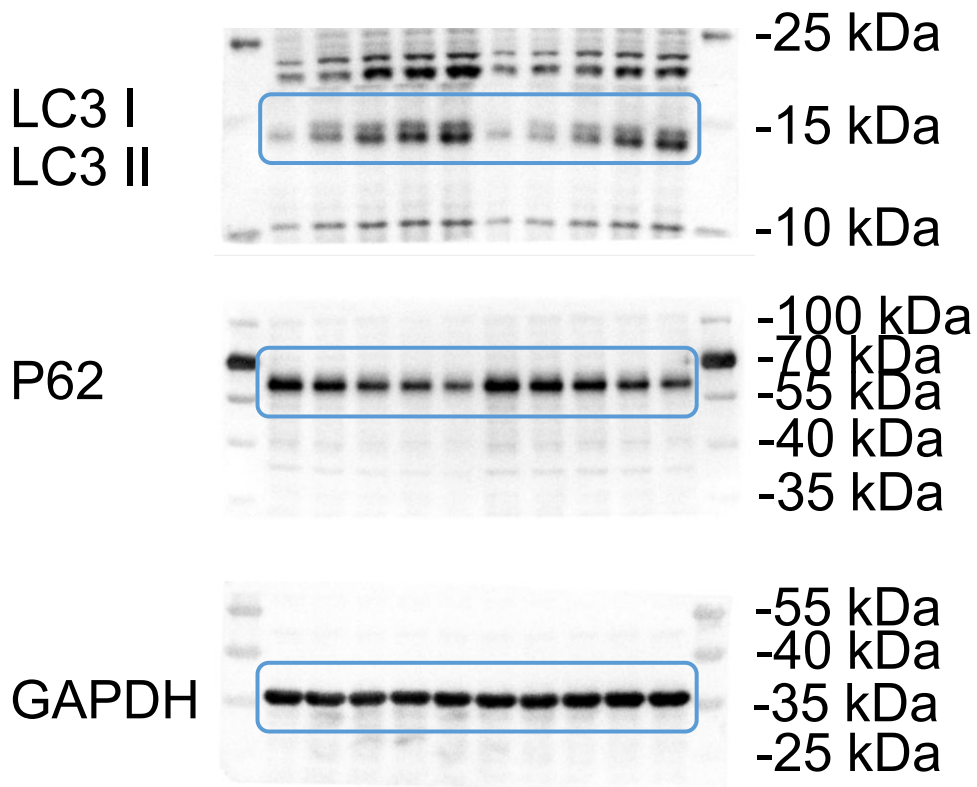

# Full unedited gel for Figure S9C

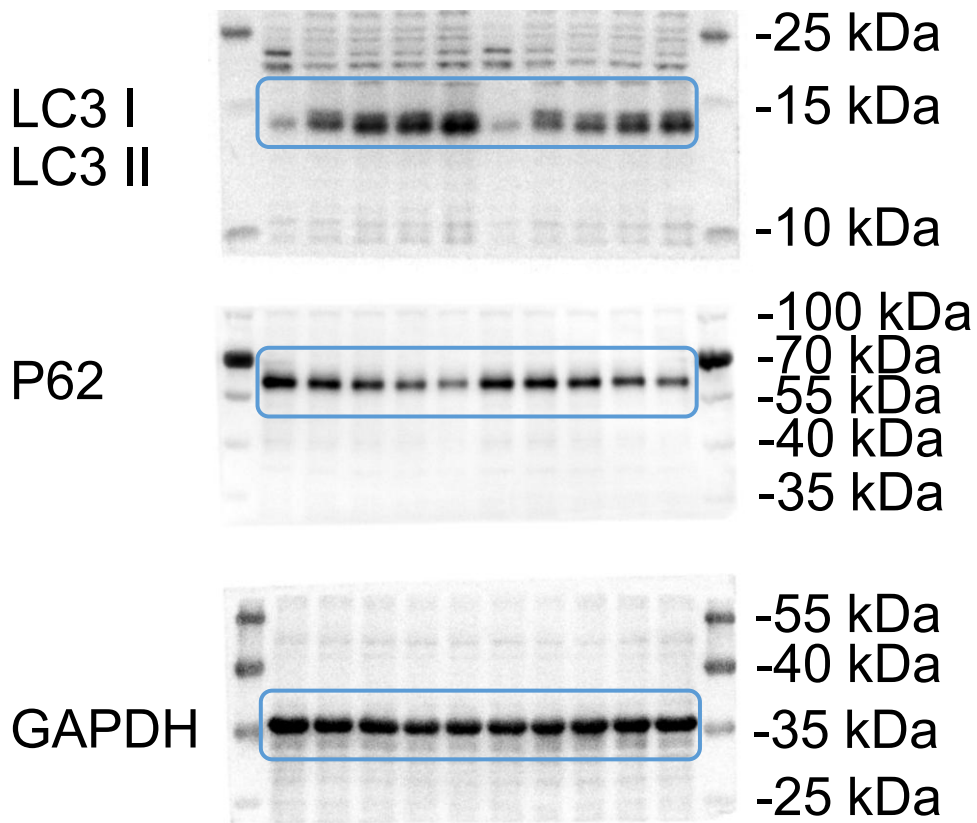

# Full unedited gel for Figure S10E

Fibronectin

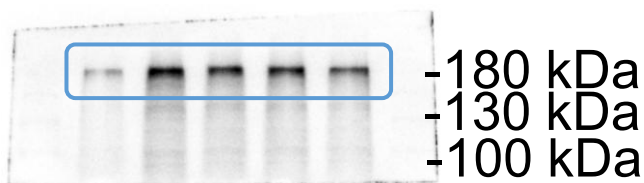

Collagen I

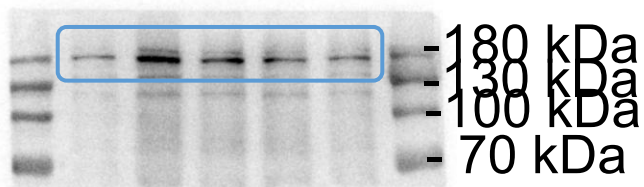

LC3 I  
LC3 II

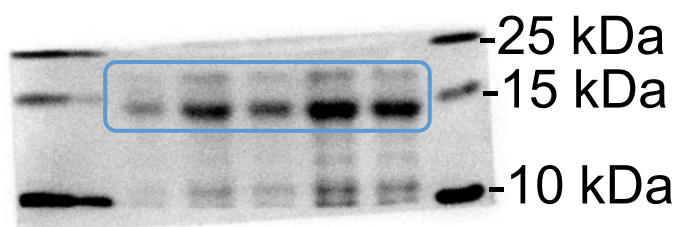

Beclin1

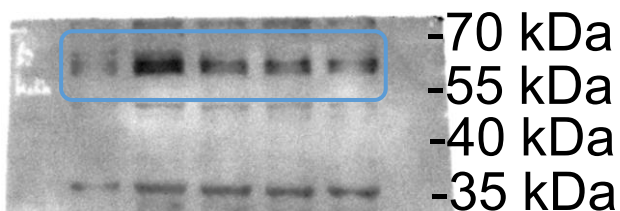

P62

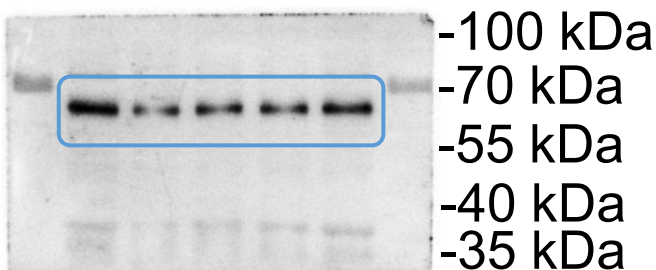

JLP

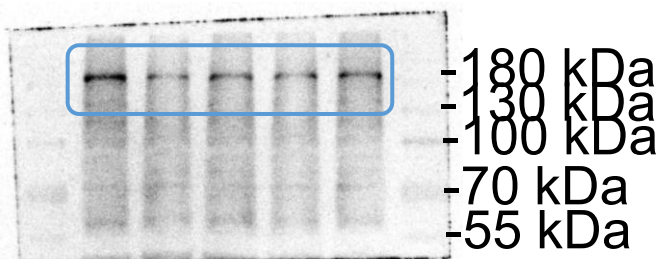

GAPDH

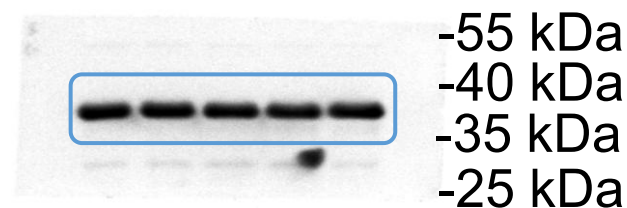

# Full unedited gel for Figure S11G

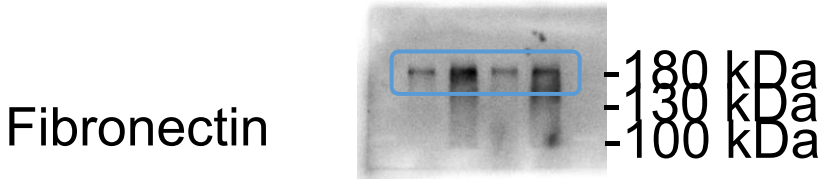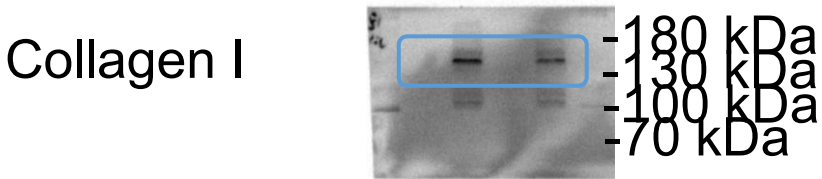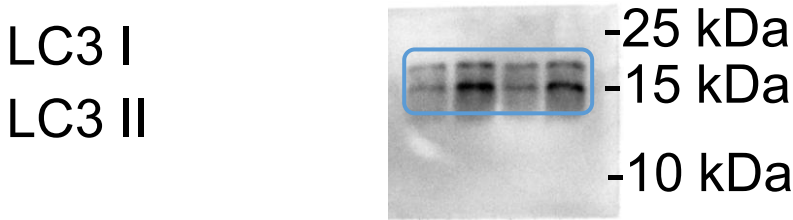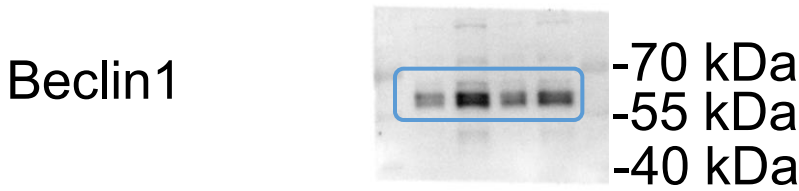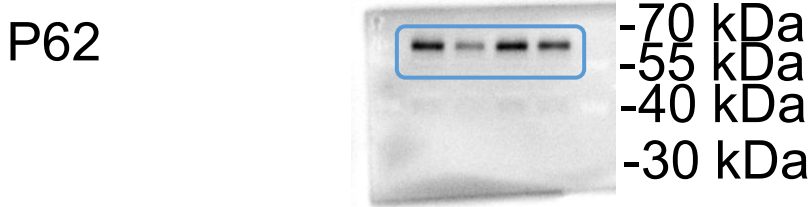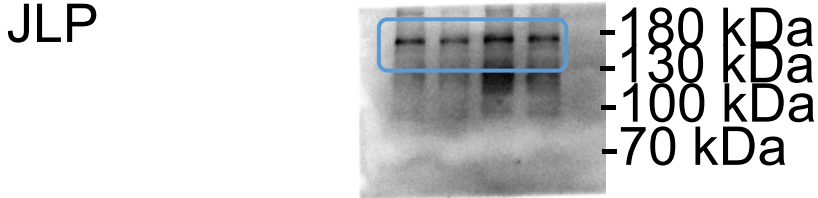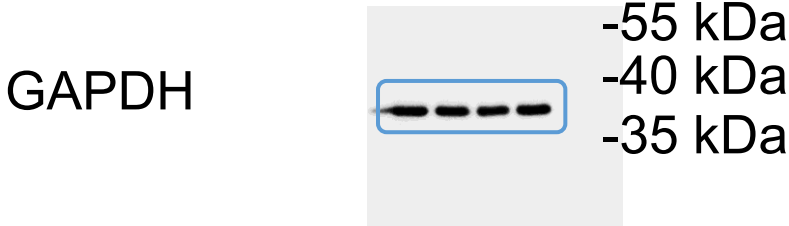

# Full unedited gel for Figure S13G

Fibronectin

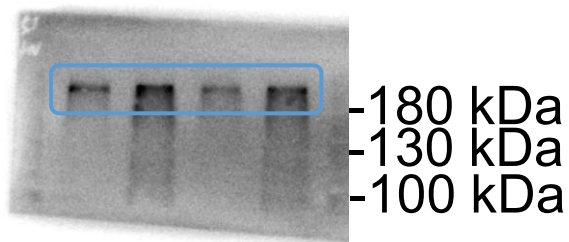

Collagen I

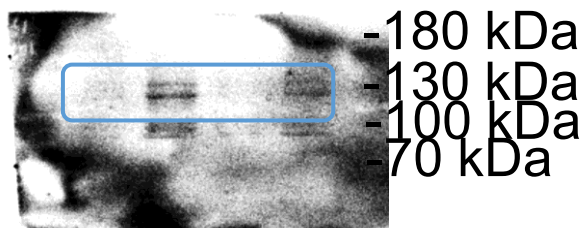

LC3 I

LC3 II

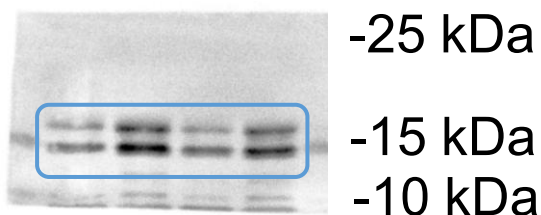

Beclin1

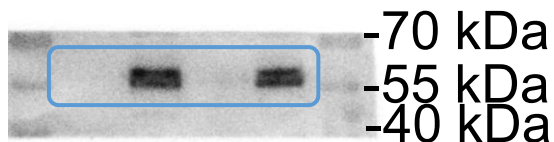

P62

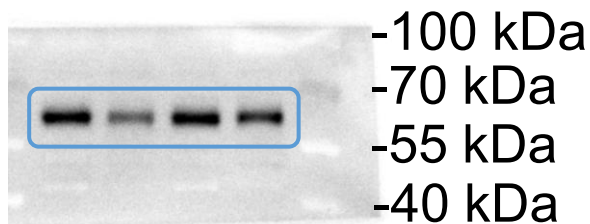

JLP

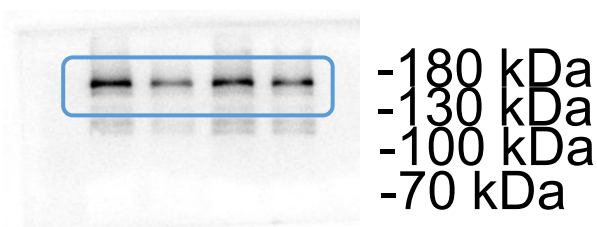

GAPDH

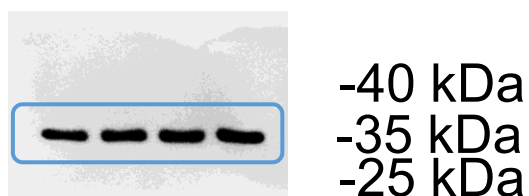

Supplement: sd1 [file 1]
